# Supplementary material
Source: publisher figshare collection journal article supplement (https://acs.figshare.com/ndownloader/files/17418815)
Supplement: Supplementary file 1 [file 17418815]

## Sheet: Metabolite modules
Table S2. WGCNA results of metabolomic dataset and analysis the levels of catechin, anthocyanins, and procyanidins.
Index	Compounds	Class	Ion mode	Q1 (Da)	Q3 (Da) MS only	Rt (min)	Molecular Weight (Da)	Ionization model	Identification level	Module	kME
pmb3074	3-O-p-Coumaroylquinicacid	Quinateanditsderivatives	Negative	337.1	190.9	3.47	338.1	[M-H]-	putatively annotated	MM1	0.87
pme2036	Quinicacid	Quinateanditsderivatives	Negative	191	85	1.14	192.063	[M-H]-	authentic standard	MM1	0.64
pme0432	ProcyanidinA2	Proanthocyanidins	Negative	575	285.3	3.64	576.127	[M-H]-	authentic standard	MM1	0.96
pme0431	ProcyanidinA1	Proanthocyanidins	Positive	577	287.9	3.67	576.127	[M+H]+	authentic standard	MM1	0.95
pmb0501	Agmatine	Phenolamides	Positive	131.1	72.1	0.64	130.1	[M+H]+	authentic standard	MM1	0.78
pme2693	N-Acetylputrescine	Phenolamides	Positive	131	71.9	0.67	130.111	[M+H]+	authentic standard	MM1	0.75
pmb0758	AnisicacidO-feruloylhexoside	Others	Positive	491.1	329.7	2.96	490.1	[M+H]+	putatively annotated	MM1	0.93
pme1667	Isovitexin7-O-glucoside(Saponarin)	Others	Positive	595.2	367.2	3.32	594.159	[M+H]+	authentic standard	MM1	0.86
pme3381	Methyl3-hydroxyphenylacetate	Others	Negative	165.1	106	4.55	166.063	[M-H]-	authentic standard	MM1	0.79
pme0249	AzelaicAcid	Organicacids	Positive	189.1	97	4.4	188.105	[M+H]+	authentic standard	MM1	0.83
pme3961	Deoxyadenosine	Nucleotideanditsderivates	Positive	252	136.1	1.81	251.102	[M+H]+	authentic standard	MM1	0.66
pme3502	Formononetin7-O-glucoside(Ononin)	Isoflavone	Negative	429.1	267.1	4.49	430.126	[M-H]-	authentic standard	MM1	0.84
pme3263	2'-Hydroxydaidzein	Isoflavone	Negative	269	225	4.44	270.053	[M-H]-	authentic standard	MM1	0.79
pme3258	6-Hydroxydaidzein	Isoflavone	Negative	269	241.1	4.32	270.053	[M-H]-	authentic standard	MM1	0.72
pme2244	3-Indolepropionicacid	Indolederivatives	Positive	190.1	130.1	5.27	189.079	[M+H]+	authentic standard	MM1	0.79
pme3456	p-Coumaraldehyde	Hydroxycinnamoylderivatives	Positive	149.1	131	4.13	148	[M+H]+	authentic standard	MM1	0.95
pmb2940	1-O-beta-D-Glucopyranosylsinapate	Hydroxycinnamoylderivatives	Negative	385.1	223.2	3.02	386.1	[M-H]-	putatively annotated	MM1	0.94
pme1458	Resveratrol	Hydroxycinnamoylderivatives	Positive	229.1	135	4.59	228.079	[M+H]+	authentic standard	MM1	0.78
pmb3047	Tricin4'-O-(syringylalcohol)ether5-O-hexoside	Flavonolignan	Negative	657.1	495.3	4.51	658.1	[M-H]-	putatively annotated	MM1	0.94
pme2975	Icariin(kaempferol3,7-O-diglucoside8-prenylderivative)	Flavonol	Positive	677.2	369.2	4.83	676.237	[M+H]+	authentic standard	MM1	0.95
pme2963	Aromadedrin(Dihydrokaempferol)	Flavonol	Negative	287.1	125.1	4.55	288.063	[M-H]-	authentic standard	MM1	0.79
pmb0624	6-C-hexosyl-luteolinO-hexoside	FlavoneC-glycosides	Positive	611.1	329	2.86	610.1	[M+H]+	putatively annotated	MM1	0.98
pmb0626	6-C-hexosyl-apigeninO-hexosyl-O-hexoside	FlavoneC-glycosides	Positive	757.1	757	3.06	756.1	[M+H]+	putatively annotated	MM1	0.98
pme3224	Vitexin2''-O-beta-L-rhamnoside	FlavoneC-glycosides	Negative	577	413.1	3.49	578.164	[M-H]-	authentic standard	MM1	0.98
pmb0621	C-hexosyl-isorhamnetinO-hexoside	FlavoneC-glycosides	Positive	641.1	623	3.01	640.1	[M+H]+	putatively annotated	MM1	0.95
pmb2976	ChrysoeriolC-pentosyl-O-hexosyl-O-hexoside	FlavoneC-glycosides	Negative	755.1	311.4	3.6	756.1	[M-H]-	putatively annotated	MM1	0.91
pma1108	ApigeninC-glucoside	FlavoneC-glycosides	Positive	433.1	271.7	3.72	432.1	[M+H]+	putatively annotated	MM1	0.87
pmb0673	Apigenin6-C-pentoside	FlavoneC-glycosides	Positive	403.1	367.7	3.99	402.1	[M+H]+	putatively annotated	MM1	0.81
pmb0661	ChrysoeriolC-hexosyl-O-rhamnoside	FlavoneC-glycosides	Positive	609.1	463.4	3.74	608.1	[M+H]+	putatively annotated	MM1	0.78
pmb0613	Apigenin6-C-hexosyl-8-C-hexosyl-O-hexoside	FlavoneC-glycosides	Positive	757.1	594.9	2.49	756.1	[M+H]+	putatively annotated	MM1	0.74
pmb0636	6-C-hexosylluteolinO-pentoside	FlavoneC-glycosides	Positive	581.1	335.9	2.98	580.1	[M+H]+	putatively annotated	MM1	0.72
pmb0622	C-hexosyl-luteolinO-hexoside	FlavoneC-glycosides	Positive	611.2	412.3	2.84	610.2	[M+H]+	putatively annotated	MM1	0.69
pmb0639	8-C-hexosyl-apigeninO-hexosyl-O-hexoside	FlavoneC-glycosides	Positive	757.2	757	2.92	756.2	[M+H]+	putatively annotated	MM1	0.64
pmb3042	Tricin5-O-hexoside	Flavone	Negative	491.1	329.3	3.9	492.1	[M-H]-	putatively annotated	MM1	0.98
pma0249	Selgin5-O-hexoside	Flavone	Positive	479.1	302.8	3.58	478.1	[M+H]+	putatively annotated	MM1	0.95
pmb0588	Luteolin3',7-di-O-glucoside	Flavone	Positive	611.1	449.4	3.31	610.1	[M+H]+	putatively annotated	MM1	0.88
pmb0605	Apigenin7-O-glucoside(Cosmosiin)	Flavone	Positive	433.1	271.7	4.14	432.1	[M+H]+	authentic standard	MM1	0.72
pmb0732	Tricin5-O-feruloylhexoside	Flavone	Positive	669.1	669	3.71	668.1	[M+H]+	putatively annotated	MM1	0.68
pme2996	4-Hydroxycoumarin	Coumarins	Negative	161	117	4.48	162.032	[M-H]-	authentic standard	MM1	0.96
pmb2947	Catechin-catechin-catechin	Catechinderivatives	Negative	865.1	407.2	3.51	866.1	[M-H]-	putatively annotated	MM1	0.76
pme2670	4-Hydroxybenzaldehyde	Benzoicacidderivatives	Negative	121	91.9	3.64	122.037	[M-H]-	authentic standard	MM1	0.71
pme0442	Delphinidin	Anthocyanins	Positive	303	149.3	2.67	303.24	Protonated	authentic standard	MM1	0.95
pme3609	Cyanidin	Anthocyanins	Positive	287	231.6	3.52	287.24	Protonated	authentic standard	MM1	0.72
pme0170	Nα-Acetyl-L-arginine	Aminoacidderivatives	Positive	217.1	158.1	1.13	216.122	[M+H]+	authentic standard	MM1	0.82
pmb2561	N-Acetylmethionine	Aminoacidderivatives	Negative	190.1	84	2.26	191.1	[M-H]-	putatively annotated	MM1	0.6
pmb0802	D-Pantothenicacid	Vitamins	Positive	220.2	202.7	2.09	219.2	[M+H]+	authentic standard	MM10	0.7
pmb4486	HordatineB	Phenolamides	Negative	579.1	423.5	2.32	580.1	[M-H]-	putatively annotated	MM10	0.7
pmb2556	SyringaldehydeO-glucoside	Others	Negative	345.1	167.2	2.13	346.1	[M-H]-	putatively annotated	MM10	0.9
pmb2497	4-Hydroxy-3-methoxymandelate	Organicacids	Negative	197	135.1	0.7	198	[M-H]-	putatively annotated	MM10	0.6
pme0038	Cytosine	Nucleotideanditsderivates	Positive	112	95	0.82	111.043	[M+H]+	authentic standard	MM10	0.81
pme3732	Cytidine	Nucleotideanditsderivates	Positive	244.1	111.4	0.81	243.086	[M+H]+	authentic standard	MM10	0.81
pme0408	Syringicacid	Hydroxycinnamoylderivatives	Negative	197.1	122.9	3.33	198.053	[M-H]-	authentic standard	MM10	0.82
pmb1312	Tricin4'-O-(β-guaiacylglyceryl)ether7-O-hexoside	Flavonolignan	Positive	689.2	688.9	4.42	688.2	[M+H]+	putatively annotated	MM10	0.75
pme3393	Fustin	Flavonol	Negative	287	135.1	3.57	288.063	[M-H]-	authentic standard	MM10	0.93
pmb0701	Chrysoeriol8-C-hexoside	FlavoneC-glycosides	Positive	463.1	367.8	3.83	462.1	[M+H]+	putatively annotated	MM10	0.85
pmb0689	ChrysoeriolC-hexoside	FlavoneC-glycosides	Positive	463.1	301.8	4.72	462.1	[M+H]+	putatively annotated	MM10	0.65
pmb0736	Tricin7-O-hexoside	Flavone	Positive	493.1	331.8	4.29	492.1	[M+H]+	putatively annotated	MM10	0.89
pmb0277	Tricin	Flavone	Positive	331.1	315.8	5.65	330.1	[M+H]+	authentic standard	MM10	0.82
pmb0712	Tricin5-O-hexosyl-O-hexoside	Flavone	Positive	655.2	331.7	3.22	654.2	[M+H]+	putatively annotated	MM10	0.79
pmb0713	Tricin7-O-hexosyl-O-hexoside	Flavone	Positive	655.2	331.7	3.46	654.2	[M+H]+	putatively annotated	MM10	0.78
pmb0724	TricinO-rhamnoside	Flavone	Positive	477.1	331.8	4.87	476.1	[M+H]+	putatively annotated	MM10	0.69
pmb3107	SyringicacidO-glucoside	Benzoicacidderivatives	Negative	359.1	197.1	2.19	360.1	[M-H]-	putatively annotated	MM10	0.85
pme0128	D-Alanyl-D-Alanine	Aminoacidderivatives	Negative	159.2	88	0.74	160.085	[M-H]-	authentic standard	MM10	0.81
pme2122	Histamine	Aminoacidderivatives	Positive	112.1	94.6	0.63	111.08	[M+H]+	authentic standard	MM10	0.81
pme2758	4-Hydroxy-L-glutamicacid	Aminoacidderivatives	Negative	162	144.1	0.7	163.129	[M-H]-	authentic standard	MM10	0.71
pme2237	Dulcitol	Alcoholsandpolyols	Negative	181.1	70.8	0.74	182.079	[M-H]-	authentic standard	MM10	0.67
pmb1240	PhellodensinF	Others	Positive	503.2	311.8	3.73	502.2	[M+H]+	putatively annotated	MM11	0.73
pme0285	4-Guanidinobutyricacid	Organicacids	Positive	146.1	85.9	0.83	145.085	[M+H]+	authentic standard	MM11	0.8
pma6281	Methylglutaricacid	Organicacids	Negative	145.1	74	0.74	146.1	[M-H]-	putatively annotated	MM11	0.78
pme3009	trans-Citridicacid	Organicacids	Positive	175	98.9	0.62	174.016	[M+H]+	authentic standard	MM11	0.78
pme2746	Flavinadeninedinucleotide(FAD)	Nucleotideanditsderivates	Negative	784.2	437.2	2.58	785.157	[M-H]-	authentic standard	MM11	0.8
pmb0530	Nicotinicacidadeninedinucleotide	Nucleotideanditsderivates	Positive	664.2	524.1	1.14	663.2	[M+H]+	authentic standard	MM11	0.77
pmb1656	MAG(18:3)isomer4	Lipids_Glycerolipids	Positive	353.1	173.7	9.85	352.1	[M+H]+	putatively annotated	MM11	0.71
pmb2444	MAG(18:3)isomer1	Lipids_Glycerolipids	Positive	353.2	261.8	9.91	352.2	[M+H]+	putatively annotated	MM11	0.6
pme1691	Acetylcholine	Cholines	Positive	147.1	88	0.83	146.118	[M+H]+	authentic standard	MM11	0.78
pmb2654	AnthranilateO-hexosyl-O-hexoside	Benzoicacidderivatives	Negative	460.1	118.2	0.75	461.1	[M-H]-	putatively annotated	MM11	0.71
pme0036	L-Histidine	Aminoacids	Negative	154.1	92.9	0.7	155.07	[M-H]-	authentic standard	MM11	0.91
pme0042	L-(+)-Arginine	Aminoacids	Negative	173.1	131.1	0.71	174.112	[M-H]-	authentic standard	MM11	0.91
pme0026	L-(+)-Lysine	Aminoacids	Positive	147	83.2	0.66	146.106	[M+H]+	authentic standard	MM11	0.9
pme0193	L-Glutamine	Aminoacids	Positive	147.1	83.7	0.66	146.069	[M+H]+	authentic standard	MM11	0.89
pme0226	L-Asparagine	Aminoacids	Negative	131.1	71.8	0.74	132.054	[M-H]-	authentic standard	MM11	0.87
pme0009	L-Serine	Aminoacids	Negative	104	73.9	0.73	105.043	[M-H]-	authentic standard	MM11	0.83
pme2527	L(+)-Ornithine	Aminoacids	Positive	133	70	0.67	132.16	[M+H]+	authentic standard	MM11	0.71
pme0007	L-Citrulline	Aminoacids	Negative	174.1	131.1	0.74	175.096	[M-H]-	authentic standard	MM11	0.69
pme0022	L-Threonine	Aminoacids	Negative	118	100.9	0.74	119.058	[M-H]-	authentic standard	MM11	0.67
pme0161	L-Homoserine	Aminoacids	Negative	118.1	101	0.74	119.058	[M-H]-	authentic standard	MM11	0.65
pme3388	H-HomoArg-OH	Aminoacidderivatives	Positive	189	144.2	0.73	188.127	[M+H]+	authentic standard	MM11	0.81
pme2773	L-Cystathionine	Aminoacidderivatives	Positive	223	88	0.84	222.067	[M+H]+	authentic standard	MM11	0.71
pme3038	5-oxoproline	Aminoacidderivatives	Positive	130	83.9	1.04	129.043	[M+H]+	authentic standard	MM11	0.65
pme2433	Diethanolamine	Others	Positive	106	88.1	0.68	105.079	[M+H]+	authentic standard	MM12	0.78
pme3188	Uridine5'-monophosphate	Nucleotideanditsderivates	Negative	323	78.8	1.14	324.036	[M-H]-	authentic standard	MM12	0.85
pme3171	Cytidine5'-monophosphate(Cytidylicacid)	Nucleotideanditsderivates	Negative	322	78.8	0.82	323.052	[M-H]-	authentic standard	MM12	0.68
pmb0854	LysoPC18:3	Lipids_Glycerophospholipids	Positive	518.3	459.6	8.66	517.3	[M+H]+	putatively annotated	MM12	0.97
pmb0855	LysoPC16:0	Lipids_Glycerophospholipids	Positive	496.3	478.3	8.74	495.3	[M+H]+	authentic standard	MM12	0.96
pmb0876	LysoPE16:0	Lipids_Glycerophospholipids	Positive	454.2	314	8.6	453.2	[M+H]+	authentic standard	MM12	0.96
pmb2406	LysoPC17:0	Lipids_Glycerophospholipids	Positive	510.1	510.4	9.29	509.1	[M+H]+	putatively annotated	MM12	0.96
pmd0160	LysoPE16:0(2nisomer)	Lipids_Glycerophospholipids	Negative	452.3	255.3	8.6	453.3	[M-H]-	authentic standard	MM12	0.96
pmb2319	LysoPC15:0	Lipids_Glycerophospholipids	Positive	482.3	184.5	8.13	481.3	[M+H]+	putatively annotated	MM12	0.92
pmb0864	LysoPE14:0	Lipids_Glycerophospholipids	Positive	426.3	285.8	7.63	425.3	[M+H]+	putatively annotated	MM12	0.91
pmd0132	LysoPC16:0(2nisomer)	Lipids_Glycerophospholipids	Positive	496.3	478.3	8.62	495.3	[M+H]+	authentic standard	MM12	0.89
pmb0883	LysoPE18:0	Lipids_Glycerophospholipids	Positive	482.1	341.9	9.73	481.1	[M+H]+	putatively annotated	MM12	0.88
pmb0852	LysoPC18:2	Lipids_Glycerophospholipids	Positive	520.3	502.3	8.29	519.3	[M+H]+	authentic standard	MM12	0.84
pmb0866	LysoPC14:0	Lipids_Glycerophospholipids	Positive	468.1	450.5	7.6	467.1	[M+H]+	authentic standard	MM12	0.84
pmb0882	LysoPC18:1	Lipids_Glycerophospholipids	Positive	522.1	125.5	9.04	521.1	[M+H]+	authentic standard	MM12	0.83
pmd0136	LysoPC18:0	Lipids_Glycerophospholipids	Positive	524.4	507.4	9.69	523.4	[M+H]+	authentic standard	MM12	0.79
pmb2369	PC19:2/16:0	Lipids_Glycerophospholipids	Positive	772.1	478.4	8.66	771.1	[M+H]+	putatively annotated	MM12	0.74
pmb3023	EriodictyolC-hexoside	FlavoneC-glycosides	Negative	449.1	329.3	3.25	450.1	[M-H]-	putatively annotated	MM12	0.66
pmb2968	ChrysoeriolC-hexosyl-O-hexoside	FlavoneC-glycosides	Negative	623.1	311.3	2.31	624.1	[M-H]-	putatively annotated	MM12	0.64
pme1008	3-Chloro-L-tyrosine	Aminoacidderivatives	Positive	216	170.1	1.87	215.035	[M+H]+	authentic standard	MM12	0.66
pmb3061	5-O-p-coumaroylquinicacidO-hexoside	Quinateanditsderivatives	Negative	499.1	163.2	2.02	500.1	[M-H]-	putatively annotated	MM13	0.83
pmb3068	1-O-p-Coumaroylquinicacid	Quinateanditsderivatives	Negative	337.1	155.8	2.71	338.1	[M-H]-	putatively annotated	MM13	0.81
pmb3056	Homovanilloylquinicacid	Quinateanditsderivatives	Negative	355.1	181.2	1.85	356.1	[M-H]-	putatively annotated	MM13	0.8
pmb3072	3-O-p-coumaroylshikimicacidO-hexoside	Quinateanditsderivatives	Negative	481.1	319.3	3.01	482.1	[M-H]-	putatively annotated	MM13	0.71
pmb3374	N-p-Coumaroylhydroxydehydroagmatine	Phenolamides	Negative	289.1	119	2.39	290.1	[M-H]-	putatively annotated	MM13	0.72
pme2706	2,3-Dihydroxybenzoicacid	Organicacids	Negative	153.2	109	2.34	154.027	[M-H]-	authentic standard	MM13	0.78
pme0085	Rosmarinicacid	Organicacids	Negative	359.3	161	4.15	360.3	[M-H]-	authentic standard	MM13	0.73
pme3346	5-hydroxyhexanoicacid	Organicacids	Negative	131.1	70.8	2.45	132.079	[M-H]-	authentic standard	MM13	0.7
pme1966	2-Aminoethanesulfonicacid	Organicacids	Positive	126	126	0.82	125.015	[M+H]+	authentic standard	MM13	0.62
pme0031	Thymine	Nucleotideanditsderivates	Positive	127	110	1.55	126.043	[M+H]+	authentic standard	MM13	0.67
pmb0848	LysoPC16:1(2nisomer)	Lipids_Glycerophospholipids	Positive	494.3	184.6	7.74	493.3	[M+H]+	authentic standard	MM13	0.76
pme0299	Cinnamicacid	Hydroxycinnamoylderivatives	Negative	147.1	61.8	5.22	148.052	[M-H]-	authentic standard	MM13	0.84
pme3268	Kaempferol3-O-galactoside(Trifolin)	Flavonol	Positive	449	286.9	3.9	448.101	[M+H]+	authentic standard	MM13	0.81
pmb1108	Luteolin6-C-hexoside8-C-hexosyl-O-hexoside	FlavoneC-glycosides	Positive	773.1	653.6	2.44	772.1	[M+H]+	putatively annotated	MM13	0.77
pme0332	Apigenin7-O-neohesperidoside(Rhoifolin)	Flavone	Negative	577.2	269.1	3.95	578.164	[M-H]-	authentic standard	MM13	0.97
pme0367	Apigenin7-rutinoside(Isorhoifolin)	Flavone	Negative	577.2	269.1	3.89	578.164	[M-H]-	authentic standard	MM13	0.97
pmb3002	Chrysoeriol7-O-rutinoside	Flavone	Negative	607.1	299.1	4.01	608.1	[M-H]-	putatively annotated	MM13	0.85
pme3300	Tricetin	Flavone	Negative	301	149.1	4.39	302.043	[M-H]-	authentic standard	MM13	0.82
pme0379	Apigenin	Flavone	Positive	271.1	215.1	5.54	270.053	[M+H]+	authentic standard	MM13	0.79
pmb3005	ChrysoeriolO-rhamnosyl-O-glucuronicacid	Flavone	Negative	621.1	299.4	4.05	622.1	[M-H]-	putatively annotated	MM13	0.76
pme0330	Naringenin7-O-neohesperidoside(Naringin)	Flavanone	Negative	579.2	135	4.02	580.179	[M-H]-	authentic standard	MM13	0.82
pme0371	Naringenin7-O-glucoside(Prunin)	Flavanone	Negative	433.1	122.9	4.22	434.121	[M-H]-	authentic standard	MM13	0.6
pme3413	Coumarin	Coumarins	Positive	147.1	91	5.04	146.037	[M+H]+	authentic standard	MM13	0.85
pme1773	Cyanidin3-O-rutinoside(Keracyanin)	Anthocyanins	Positive	595	287.9	2.47	595	Protonated	authentic standard	MM2	0.88
pme2289	VitaminA	Vitamins	Positive	287.2	143.4	11.01	286.23	[M+H]+	authentic standard	MM14	0.69
pmb1530	PhytocassaneD	Terpenoids	Positive	317.1	299.9	7.29	316.1	[M+H]+	putatively annotated	MM14	0.87
pme2901	1-O-Caffeoylquinicacid	Quinateanditsderivatives	Negative	353.1	191.1	2.3	354.095	[M-H]-	authentic standard	MM14	0.88
pmb0750	Neochlorogenicacid(5-O-Caffeoylquinicacid)	Quinateanditsderivatives	Positive	355.1	145.4	2.29	354.1	[M+H]+	authentic standard	MM14	0.84
pmb3317	Quinacylsyringicacid	Quinateanditsderivatives	Negative	371.1	179.2	1.84	372.1	[M-H]-	putatively annotated	MM14	0.61
pme2550	Cis-Aconiticacid	Organicacids	Negative	173	137	0.85	174.016	[M-H]-	authentic standard	MM14	0.89
pme0397	Shikimicacid	Organicacids	Negative	173.1	92.9	1.01	174.053	[M-H]-	authentic standard	MM14	0.87
pme1292	Homogentisicacid	Organicacids	Negative	167.1	122.1	2.06	168.042	[M-H]-	authentic standard	MM14	0.79
pme1119	Inosine	Nucleotideanditsderivates	Positive	269.1	137	0.73	268.081	[M+H]+	authentic standard	MM14	0.88
pmb0149	MAG(18:4)isomer1	Lipids_Glycerolipids	Positive	351	259.8	6.57	350	[M+H]+	putatively annotated	MM14	0.76
pmb0885	4-oxo-9Z,11Z,13E,15E-octadecatetraenoicacid	Lipids_Fattyacids	Positive	291	273.9	6.58	290	[M+H]+	putatively annotated	MM14	0.82
pmb2784	13-HOTrE	Lipids_Fattyacids	Negative	293.2	275.6	10.15	294.2	[M-H]-	putatively annotated	MM14	0.82
pmb2643	Myristoleicacid(C14:1)	Lipids_Fattyacids	Negative	225	207.2	9.93	226	[M-H]-	authentic standard	MM14	0.78
pmb2795	4-Methoxycinnamicacid	Hydroxycinnamoylderivatives	Negative	177	145.2	5.4	178	[M-H]-	putatively annotated	MM14	0.7
pme3484	Myricetin3-O-galactoside	Flavonol	Negative	479.1	317.3	3.51	480.09	[M-H]-	authentic standard	MM14	0.81
pme1551	Myricetin3-O-rhamnoside(Myricitrin)	Flavonol	Negative	463.1	300	3.85	464.096	[M-H]-	authentic standard	MM14	0.74
pma6353	ChrysinC-hexoside	FlavoneC-glycosides	Positive	417.2	381.9	3.98	416.2	[M+H]+	putatively annotated	MM14	0.66
pma0724	NaringeninC-hexoside	FlavoneC-glycosides	Positive	435.1	339.7	3.72	434.1	[M+H]+	putatively annotated	MM14	0.61
pme1201	Phloretin	Flavanone	Negative	273.1	167.1	5.49	274.084	[M-H]-	authentic standard	MM14	0.91
pmb3093	6,7-dihydroxycoumarin7-O-quinicacid	Coumarins	Negative	351.1	132.6	2.28	352.1	[M-H]-	putatively annotated	MM14	0.82
pme2486	Protocatechuicacid	Catechinderivatives	Positive	155	137	2.12	154.027	[M+H]+	authentic standard	MM14	0.79
pme1417	L-Tryptamine	Tryptaminederivatives	Positive	161.1	144.2	2.59	160.1	[M+H]+	authentic standard	MM15	0.92
pme2786	N-Acetyl-5-hydroxytryptamine	Tryptaminederivatives	Positive	219	160.1	3.23	218.106	[M+H]+	authentic standard	MM15	0.78
pme1806	Chlorogenicacidmethylester	Quinateanditsderivatives	Negative	367	179.1	3.59	368.111	[M-H]-	authentic standard	MM15	0.86
pme2596	4-Pyridoxicacid	Pyridinederivatives	Positive	184.1	148.1	1.64	183.053	[M+H]+	authentic standard	MM15	0.69
pme1578	Genistein(4',5,7-Trihydroxyisoflavone)	Isoflavone	Positive	271.1	215.1	5.39	270.053	[M+H]+	authentic standard	MM15	0.64
pmb0818	Methoxyindoleaceticacid	Indolederivatives	Positive	206.1	147.5	2.3	205.1	[M+H]+	putatively annotated	MM15	0.93
pmb1096	Indole	Indolederivatives	Positive	118	58.2	2.3	117	[M+H]+	putatively annotated	MM15	0.93
pme2836	5-Hydroxytryptophol	Indolederivatives	Positive	178.1	160.1	3.13	177.079	[M+H]+	authentic standard	MM15	0.65
pme1424	Coniferylaldehyde	Hydroxycinnamoylderivatives	Negative	177.1	177.1	4.55	178.063	[M-H]-	authentic standard	MM15	0.7
pmb0743	Tricin7-O-β-guaiacylglycerol	Flavonolignan	Positive	527.1	331.7	5.32	526.1	[M+H]+	putatively annotated	MM15	0.73
pme3514	Morin	Flavonol	Negative	301	151.1	5.04	302.043	[M-H]-	authentic standard	MM15	0.85
pme1521	Dihydroquercetin(Taxifolin)	Flavonol	Negative	303.1	125.1	4.07	304.058	[M-H]-	authentic standard	MM15	0.81
pme2954	Quercetin	Flavonol	Positive	303	303	5.04	302.043	[M+H]+	authentic standard	MM15	0.77
pme1480	Myricetin	Flavonol	Positive	319	319	4.29	318.038	[M+H]+	authentic standard	MM15	0.76
pma0214	methylQuercetinO-hexoside	Flavonol	Positive	479	317.3	3.84	478	[M+H]+	putatively annotated	MM15	0.63
pma6639	IsorhamnetinO-hexoside	Flavonol	Positive	479.2	318	4.04	478.2	[M+H]+	putatively annotated	MM15	0.62
pmb0595	Isorhamnetin5-O-hexoside	Flavonol	Positive	479.2	317.8	4.04	478.2	[M+H]+	putatively annotated	MM15	0.62
pmb2978	ApigeninO-hexosyl-O-pentoside	Flavone	Negative	563.1	269.3	3.92	564.1	[M-H]-	putatively annotated	MM15	0.89
pmb3007	ChrysoeriolO-glucuronicacid	Flavone	Negative	475.1	284.5	4.15	476.1	[M-H]-	putatively annotated	MM15	0.67
pma6576	Spinacetin	Flavone	Positive	347	288	4.25	346	[M+H]+	putatively annotated	MM15	0.6
pme3285	Afzelechin(3,5,7,4'-Tetrahydroxyflavan)	Flavanone	Positive	275	139.1	3.28	274.084	[M+H]+	authentic standard	MM15	0.65
pme2478	Protocatechuicaldehyde	Catechinderivatives	Negative	137.1	137	2.81	138.032	[M-H]-	authentic standard	MM15	0.9
pme0426	4-Methylcatechol	Catechinderivatives	Negative	123.1	122.9	4.1	124.052	[M-H]-	authentic standard	MM15	0.85
pme2054	L-Tryptophan	Aminoacids	Positive	205.1	146.1	2.3	204.09	[M+H]+	authentic standard	MM15	0.94
pme1228	5-Hydroxy-L-tryptophan	Aminoacidderivatives	Positive	221.1	114.8	1.54	220.085	[M+H]+	authentic standard	MM15	0.78
pmb0785	Isoquinoline	Alkaloids	Positive	130.1	128.4	4.64	129.1	[M+H]+	putatively annotated	MM15	0.61
pmb2648	Thiamine	Vitamins	Negative	263.1	147.2	0.73	264.1	[M-H]-	authentic standard	MM16	0.66
pme0272	Benzoylformicacid	Organicacids	Negative	149	76.9	2.38	150.032	[M-H]-	authentic standard	MM16	0.85
pme0265	Sebacate	Organicacids	Positive	203.1	93	4.84	202.12	[M+H]+	authentic standard	MM16	0.76
pme2362	Mandelicacid	Organicacids	Negative	151	105	3.07	152.047	[M-H]-	authentic standard	MM16	0.76
pme1266	3-Methylxanthine	Nucleotideanditsderivates	Positive	167.1	124	1.81	166.049	[M+H]+	authentic standard	MM16	0.88
pme2765	1,7-Dimethylxanthine	Nucleotideanditsderivates	Positive	181.1	145	2.36	180.065	[M+H]+	authentic standard	MM16	0.83
pme0489	N-Methylnicotinamide	Nicotinicacidderivatives	Positive	137	108	1.85	136	[M+H]+	authentic standard	MM16	0.84
pmb0812	Imidazole-4-acetate	Indolederivatives	Positive	127.1	81.2	2.69	126.1	[M+H]+	putatively annotated	MM16	0.78
pme0422	3-Hydroxy-4-methoxycinnamicacid	Hydroxycinnamoylderivatives	Negative	193.1	134.1	4.01	194.058	[M-H]-	authentic standard	MM16	0.89
pme0305	Ferulicacid	Hydroxycinnamoylderivatives	Negative	193.1	134.1	4.01	194.058	[M-H]-	authentic standard	MM16	0.88
pmb2620	3,4-Dimethoxycinnamicacid	Hydroxycinnamoylderivatives	Negative	207.1	192.1	5.59	208.1	[M-H]-	putatively annotated	MM16	0.86
pmb0423	Hydroxy-methoxycinnamate	Hydroxycinnamoylderivatives	Positive	195.1	177.5	2.99	194.1	[M+H]+	putatively annotated	MM16	0.85
pme3246	Coniferin	Hydroxycinnamoylderivatives	Negative	341	179.1	2.52	342.132	[M-H]-	authentic standard	MM16	0.8
pme1637	Coniferylalcohol	Hydroxycinnamoylderivatives	Negative	179.1	146.1	3.82	180.079	[M-H]-	authentic standard	MM16	0.7
pmb3894	Di-O-methylquercetin	Flavonol	Negative	329.1	314.3	5.78	330.1	[M-H]-	putatively annotated	MM16	0.61
pmb0720	TricinO-malonylhexoside	Flavone	Positive	579.1	331.7	4.46	578.1	[M+H]+	putatively annotated	MM16	0.74
pme2319	Hesperetin	Flavanone	Negative	301.1	242.1	5.66	302.079	[M-H]-	authentic standard	MM16	0.89
pme3217	Isoliquiritigenin	Flavanone	Positive	257	137.1	6.01	256.074	[M+H]+	authentic standard	MM16	0.8
pme0413	Vanillin	Benzoicacidderivatives	Negative	151	136.1	3.93	152.047	[M-H]-	authentic standard	MM16	0.64
pme1210	L-Methionine	Aminoacids	Positive	150	72.8	1.13	149.051	[M+H]+	authentic standard	MM16	0.65
pme2560	N-Acetylaspartate	Aminoacidderivatives	Positive	176	88	1.26	175.048	[M+H]+	authentic standard	MM16	0.69
pme1286	S-(5'-Adenosy)-L-homocysteine	Aminoacidderivatives	Positive	385	136.1	1.35	384.122	[M+H]+	authentic standard	MM16	0.6
pme2155	Theobromine	Alkaloids	Positive	181	67	2.18	180	[M+H]+	authentic standard	MM16	0.94
mws2219	Theophylline	Alkaloids	Positive	181.065	124.1	2.42	180.065	[M+H]+	authentic standard	MM16	0.81
pma0149	Sinapoylmalate	Organicacids	Positive	341.1	179.4	2.23	340.1	[M+H]+	putatively annotated	MM17	0.74
pmb0514	Adenosine3'-monophosphate	Nucleotideanditsderivates	Positive	348.1	136.4	0.83	347.1	[M+H]+	putatively annotated	MM17	0.84
pme2278	Guanosinemonophosphate	Nucleotideanditsderivates	Negative	362	78.9	1.16	363.058	[M-H]-	authentic standard	MM17	0.82
pmb4344	Guanosine5'-monophosphate	Nucleotideanditsderivates	Negative	362.1	211.1	1.14	363.1	[M-H]-	authentic standard	MM17	0.81
pme2555	Adenosine5'-monophosphate	Nucleotideanditsderivates	Negative	346	78.8	1.14	347.063	[M-H]-	authentic standard	MM17	0.75
pmb0859	LysoPC18:1(2nisomer)	Lipids_Glycerophospholipids	Positive	522.4	184.5	8.85	521.4	[M+H]+	authentic standard	MM17	0.94
pmc0960	LysoPC20:4	Lipids_Glycerophospholipids	Positive	544.4	544.4	8.81	543.4	[M+H]+	putatively annotated	MM17	0.94
pmb2388	LysoPC18:0(2nisomer)	Lipids_Glycerophospholipids	Positive	524.1	507.4	8.77	523.1	[M+H]+	authentic standard	MM17	0.93
pmb0874	LysoPE18:2(2nisomer)	Lipids_Glycerophospholipids	Positive	478.6	337.9	8.24	477.6	[M+H]+	putatively annotated	MM17	0.92
pmb0865	LysoPC18:3(2nisomer)	Lipids_Glycerophospholipids	Positive	518.2	500.3	7.59	517.2	[M+H]+	putatively annotated	MM17	0.9
pmd0144	LysoPC20:1(2nisomer)	Lipids_Glycerophospholipids	Positive	550.4	245.1	9.81	549.4	[M+H]+	authentic standard	MM17	0.88
pmd0145	LysoPC20:1	Lipids_Glycerophospholipids	Positive	550.4	245.1	9.9	549.4	[M+H]+	authentic standard	MM17	0.88
pmb0873	LysoPC18:2(2nisomer)	Lipids_Glycerophospholipids	Positive	520	125	8.15	519	[M+H]+	authentic standard	MM17	0.83
pma6561	CaffeicacidO-glucoside	Hydroxycinnamoylderivatives	Negative	341	179.2	2.79	342	[M-H]-	putatively annotated	MM17	0.78
pme0133	Asp-phe	Aminoacidderivatives	Positive	281.3	120	2.38	280.106	[M+H]+	authentic standard	MM17	0.8
pme0166	1-Methylxanthine	Nucleotideanditsderivates	Positive	167.1	110	2.09	166.049	[M+H]+	authentic standard	MM18	0.9
pmb2922	Uridine5'-diphospho-D-glucose	Nucleotideanditsderivates	Negative	565.1	323.3	1.13	566.1	[M-H]-	putatively annotated	MM18	0.88
pme3007	Uridine5’-diphosphate	Nucleotideanditsderivates	Negative	403	159	0.66	404.161	[M-H]-	authentic standard	MM18	0.72
pme0183	2-Hydroxy-6-aminopurine	Nucleotideanditsderivates	Positive	152.1	135.1	0.83	151.049	[M+H]+	authentic standard	MM18	0.6
pmb0877	LysoPE18:1	Lipids_Glycerophospholipids	Positive	480.1	339.9	8.73	479.1	[M+H]+	putatively annotated	MM18	0.97
pmb0856	LysoPE18:1(2nisomer)	Lipids_Glycerophospholipids	Positive	480.5	339.9	8.73	479.5	[M+H]+	putatively annotated	MM18	0.96
pmb0862	LysoPC12:1	Lipids_Glycerophospholipids	Positive	440.1	422.7	6.64	439.1	[M+H]+	putatively annotated	MM18	0.9
pmd0130	LysoPC14:0(2nisomer)	Lipids_Glycerophospholipids	Positive	468.3	450.5	7.5	467.3	[M+H]+	authentic standard	MM18	0.9
pmb2165	LysoPC10:0	Lipids_Glycerophospholipids	Positive	412.3	184.7	5.6	411.3	[M+H]+	putatively annotated	MM18	0.82
pmd0158	LysoPE14:0(2nisomer)	Lipids_Glycerophospholipids	Negative	424.2	285.8	7.37	425.2	[M-H]-	authentic standard	MM18	0.8
pme3313	D-Fructose6-phosphate	Carbohydrates	Negative	259	78.8	0.97	260.03	[M-H]-	authentic standard	MM18	0.73
pme1777	Cyanidin3,5-O-diglucoside(Cyanin)	Anthocyanins	Positive	611	287.7	1.93	611	Protonated	authentic standard	MM2	0.78
pme0006	L-Proline	Aminoacids	Positive	116.1	70	0.81	115.063	[M+H]+	authentic standard	MM18	0.64
pma3724	1-O-Feruloylquinicacid	Quinateanditsderivatives	Positive	369.1	207.5	3.37	368.1	[M+H]+	putatively annotated	MM2	0.89
pmb0752	3-O-Feruloylquinicacid	Quinateanditsderivatives	Positive	369.1	177.5	2.75	368.1	[M+H]+	putatively annotated	MM2	0.78
pmb0837	ProcyanidinA3	Proanthocyanidins	Positive	577.1	425.4	2.61	576.1	[M+H]+	putatively annotated	MM2	0.79
pmb0130	N-Acetyltryptamine	Phenolamides	Positive	203	133.3	4.62	202	[M+H]+	putatively annotated	MM2	0.88
pmd0017	Spermine	Phenolamides	Positive	203	112	0.6	202	[M+H]+	authentic standard	MM2	0.77
pmb0896	N'-Feruloylputrescine	Phenolamides	Positive	265.1	177.5	2.29	264.1	[M+H]+	putatively annotated	MM2	0.72
pmb0907	N-Feruloylputrescine	Phenolamides	Positive	265.1	177.5	2.35	264.1	[M+H]+	putatively annotated	MM2	0.7
pme3069	Taurocholicacid	Organicacids	Positive	556.3	371.2	10.22	555.284	[M+H]+	authentic standard	MM2	0.7
pme1936	Creatinine	Organicacids	Positive	114.1	114	0.59	113.059	[M+H]+	authentic standard	MM2	0.66
pmb0197	N2-methylguanosine	Nucleotideanditsderivates	Positive	298.1	166.5	1.14	297.1	[M+H]+	putatively annotated	MM2	0.96
pme1346	8-Hydroxyguanosine	Nucleotideanditsderivates	Positive	300.1	168.1	1.57	299.087	[M+H]+	authentic standard	MM2	0.91
pme0263	5-Methyluridine	Nucleotideanditsderivates	Positive	259.1	126.7	1.72	258.085	[M+H]+	authentic standard	MM2	0.9
pme1194	Deoxycytidine	Nucleotideanditsderivates	Positive	228	112	1.13	227.091	[M+H]+	authentic standard	MM2	0.82
pmc0304	Succinyladenosine	Nucleotideanditsderivates	Positive	384.1	252.2	2.01	383.1	[M+H]+	putatively annotated	MM2	0.81
pme0108	5-Methylcytosine	Nucleotideanditsderivates	Positive	126.1	126.1	1.14	125.059	[M+H]+	authentic standard	MM2	0.81
pme0264	Thymidine	Nucleotideanditsderivates	Positive	243.1	127.1	1.92	242.09	[M+H]+	authentic standard	MM2	0.78
pme3337	N6-SuccinylAdenosine	Nucleotideanditsderivates	Positive	384	252.1	2.01	383.108	[M+H]+	authentic standard	MM2	0.78
pmb0964	iP7G	Nucleotideanditsderivates	Positive	366.2	203.5	0.79	365.2	[M+H]+	putatively annotated	MM2	0.72
pme3967	2-(dimethylamino)guanosine	Nucleotideanditsderivates	Positive	312	180.1	2.11	311.123	[M+H]+	authentic standard	MM2	0.7
mws2217	7-Methylxanthosine	Nucleotide and its derivates	Positive	167.049	107	1.2	166.049	[M+H]+	authentic standard	MM2	0.94
pmb0161	DGMG(18:2)isomer1	Lipids_Glycerolipids	Positive	696.4	337.8	7.97	695.4	[M+H]+	putatively annotated	MM2	0.7
pme0303	Caffeicacid	Hydroxycinnamoylderivatives	Negative	179	135.1	3.22	180.042	[M-H]-	authentic standard	MM2	0.82
pme1646	Pinoresinol	Hydroxycinnamoylderivatives	Negative	357.1	136.1	5.31	358.142	[M-H]-	authentic standard	MM2	0.71
pmb3052	Tricin4'-O-β-guaiacylglycerol	Flavonolignan	Negative	525.1	314.5	5.75	526.1	[M-H]-	putatively annotated	MM2	0.63
pma1116	Kaempferide	Flavonol	Positive	301.1	259.1	3.98	300.1	[M+H]+	putatively annotated	MM2	0.86
pme3130	Quercetin4'-O-glucoside(Spiraeoside)	Flavonol	Positive	465	302.9	3.81	464.096	[M+H]+	authentic standard	MM2	0.73
pme3212	Quercetin3-O-glucoside(Isotrifoliin)	Flavonol	Positive	465	302.8	3.81	464.096	[M+H]+	authentic standard	MM2	0.7
pmb0733	Tricin5-O-rutinoside	Flavone	Positive	639.1	331.8	4.01	638.1	[M+H]+	putatively annotated	MM2	0.68
pmb0808	6,7-dihydroxycoumarin6-O-quinicacid	Coumarins	Positive	353.1	272.8	2.62	352.1	[M+H]+	putatively annotated	MM2	0.77
pma1840	Coumaroylcholine	Cholines	Positive	250	191.3	2.67	250	Protonated	putatively annotated	MM2	0.81
pme0460	L-Epicatechin	Catechinderivatives	Positive	291	139.1	3.26	290.3	[M+H]+	authentic standard	MM2	0.75
pme3392	Pelargonidin3-O-beta-D-glucoside（Callistephinchloride)	Anthocyanins	Positive	433.1	271	2.64	433.1	Protonated	authentic standard	MM3	0.87
pme1793	Pelargonin	Anthocyanins	Positive	595	271.8	2.27	595	Protonated	authentic standard	MM3	0.86
pmb0550	Cyanidin3-O-glucoside(Kuromanin)	Anthocyanins	Positive	449.1	287.3	2.35	449.1	Protonated	authentic standard	MM3	0.76
pmb2591	Acetyltryptophan	Aminoacidderivatives	Negative	245	203.2	3.83	246	[M-H]-	putatively annotated	MM2	0.91
pme0231	N-(3-Indolylacetyl)-L-alanine	Aminoacidderivatives	Positive	247.1	130.1	3.98	246.1	[M+H]+	authentic standard	MM2	0.89
pme2617	Methioninesulfoxide	Aminoacidderivatives	Positive	166	149.1	0.6	165.046	[M+H]+	authentic standard	MM2	0.79
pme2268	Trigonelline	Alkaloids	Positive	138	137.9	0.78	137.048	[M+H]+	authentic standard	MM2	0.73
pme1944	D-Mannitol	Alcoholsandpolyols	Positive	183.1	111	0.81	182.079	[M+H]+	authentic standard	MM2	0.7
pme2529	1,5-Anhydro-D-glucitol	Alcoholsandpolyols	Negative	163.2	162.9	0.86	164.069	[M-H]-	authentic standard	MM2	0.65
pmb0801	4-PyridoxicacidO-hexoside	Vitamins	Positive	346	184.5	1.55	345	[M+H]+	putatively annotated	MM3	0.77
pme1450	Melatonin	Tryptaminederivatives	Negative	231	144.1	4.56	232.121	[M-H]-	authentic standard	MM3	0.7
pmb2938	4-O-Caffeoylquinicacid(criptochlorogenicacid)	Quinateanditsderivatives	Negative	353.1	191.2	2.82	354.1	[M-H]-	putatively annotated	MM3	0.67
pmb1912	10-Formyl-THF	Others	Positive	474.2	327.8	2.22	473.2	[M+H]+	putatively annotated	MM3	0.64
pme0289	4-Ethylbenzoicacid	Organicacids	Positive	151.1	78.8	5.89	150.068	[M+H]+	authentic standard	MM3	0.77
pme2033	L(-)-Malicacid	Organicacids	Negative	133	70.8	0.97	134.022	[M-H]-	authentic standard	MM3	0.65
pme2598	3,4-Dihydroxybenzeneaceticacid	Organicacids	Negative	167.1	139	2.28	168.042	[M-H]-	authentic standard	MM3	0.64
pmb2826	Citramalate	Organicacids	Negative	147	85	1.02	148	[M-H]-	putatively annotated	MM3	0.62
pme1184	Deoxyguanosine	Nucleotideanditsderivates	Positive	268.1	151.7	1.64	267.097	[M+H]+	authentic standard	MM3	0.75
pme3983	Hypoxanthine-9-β-D-arabinofuranoside	Nucleotideanditsderivates	Positive	269.1	137.1	1.46	268.081	[M+H]+	authentic standard	MM3	0.66
pme1474	5'-Deoxy-5'-(methylthio)adenosine	Nucleotideanditsderivates	Positive	298	135.1	2.71	297.09	[M+H]+	authentic standard	MM3	0.61
pmb0108	Feruloylsyringicacid	Hydroxycinnamoylderivatives	Positive	375.2	137.6	3.39	374.2	[M+H]+	putatively annotated	MM3	0.86
pme3446	Sinapinaldehyde	Hydroxycinnamoylderivatives	Positive	209.1	149.1	4.53	208	[M+H]+	authentic standard	MM3	0.7
pme0370	Kaempferol3-O-rutinoside(Nicotiflorin)	Flavonol	Positive	595.2	287.1	3.8	594.159	[M+H]+	authentic standard	MM3	0.97
pme1606	Kaempferol3-O-robinobioside(Biorobin)	Flavonol	Positive	595.2	287	3.8	594.159	[M+H]+	authentic standard	MM3	0.97
pmb0711	Quercetin7-O-rutinoside	Flavonol	Positive	611.2	303.7	3.65	610.2	[M+H]+	putatively annotated	MM3	0.96
pme0202	Quercetin3-O-rutinoside(Rutin)	Flavonol	Positive	611.2	303	3.66	610.153	[M+H]+	authentic standard	MM3	0.96
pme1540	Isorhamnetin3-O-neohesperidoside	Flavonol	Positive	625.2	317.1	3.54	624.169	[M+H]+	authentic standard	MM3	0.76
pme3473	Butin	Flavone	Negative	271.1	151	5.55	272.069	[M-H]-	authentic standard	MM3	0.94
pmb3028	TricinO-sinapicacid	Flavone	Negative	535	329.4	3.71	536	[M-H]-	putatively annotated	MM3	0.64
pme2950	Hesperetin7-rutinoside(Hesperidin)	Flavanone	Positive	611.2	303	4	610.19	[M+H]+	authentic standard	MM3	0.95
pme0376	Naringenin	Flavanone	Negative	271.1	151	5.53	272.068	[M-H]-	authentic standard	MM3	0.94
pme2957	Naringeninchalcone	Flavanone	Negative	271.1	151.1	5.45	272.069	[M-H]-	authentic standard	MM3	0.94
pmb4777	4-Hydroxy-7-methoxycoumarin-beta-rhamnoside	Coumarins	Negative	337.1	143.2	4.39	338.1	[M-H]-	putatively annotated	MM3	0.96
pmb0484	Choline	Cholines	Positive	104.1	60.2	0.74	103.1	[M+H]+	authentic standard	MM3	0.78
pmb2858	Maltotetraose	Carbohydrates	Negative	665.1	485.3	0.8	666.1	[M-H]-	putatively annotated	MM3	0.71
pme0500	D(+)-Melezitose	Carbohydrates	Negative	503.4	323.2	0.79	504.169	[M-H]-	authentic standard	MM3	0.68
pme1398	Delphinidin3-O-glucoside(Mirtillin)	Anthocyanins	Positive	465.1	303.1	2.14	465.1	Protonated	authentic standard	MM3	0.75
pme3256	Delphinidin3-O-rutinoside(Tulipanin)	Anthocyanins	Positive	611	303	2.51	611	Protonated	authentic standard	MM9	0.97
pme1397	Pelargonidin	Anthocyanins	Positive	271	215.1	3.75	271.24	Protonated	authentic standard	UNCLASSIFIED	NA
pmb0545	RosinidinO-hexoside	Anthocyanins	Positive	477.1	315.6	3.36	477.1	Protonated	putatively annotated	MM13	0.65
pmb2959	CyanidinO-acetylhexoside	Anthocyanins	Negative	489.1	285.3	2.91	490.1	[M-H]-	putatively annotated	MM18	0.78
pme1894	D-Sorbitol	Alcoholsandpolyols	Positive	183	59.3	0.82	182.079	[M+H]+	authentic standard	MM3	0.66
pmb3066	5-O-p-coumaroylshikimicacidO-hexoside	Quinateanditsderivatives	Negative	481.1	445.4	2.41	482.1	[M-H]-	putatively annotated	MM4	0.75
pmb0504	N-(4'-O-glycosyl)-feruloylagmatine	Phenolamides	Positive	469.1	307.7	2.23	468.1	[M+H]+	putatively annotated	MM4	0.96
pmb0325	N-Feruloylspermidine	Phenolamides	Positive	321.1	177.5	3.02	320.1	[M+H]+	putatively annotated	MM4	0.93
pma0692	N',N''-di-p-coumaroylspermidine	Phenolamides	Positive	438.2	147.5	3.37	437.2	[M+H]+	putatively annotated	MM4	0.85
pme2830	O-Phosphorylethanolamine	Others	Negative	140	78.5	0.72	141.019	[M-H]-	authentic standard	MM4	0.87
pmb3101	2-Isopropylmalate	Organicacids	Negative	175.1	131.3	2.59	176.1	[M-H]-	putatively annotated	MM4	0.92
pmb2657	Argininosuccinate	Organicacids	Negative	289.1	191.2	0.7	290.1	[M-H]-	putatively annotated	MM4	0.85
pme2129	(S)-(-)-2-Hydroxyisocaproicacid	Organicacids	Negative	131.1	68.9	3.51	132.079	[M-H]-	authentic standard	MM4	0.66
pme1109	Guanine	Nucleotideanditsderivates	Positive	152	135.1	1.13	151.049	[M+H]+	authentic standard	MM4	0.62
pme0355	Daidzein	Isoflavone	Positive	255.1	199.1	4.86	254.058	[M+H]+	authentic standard	MM4	0.72
pmb2835	Syringaldehyde	Hydroxycinnamoylderivatives	Negative	181.1	151.1	4.02	182.1	[M-H]-	putatively annotated	MM4	0.97
pme3123	Sinapylalcohol	Hydroxycinnamoylderivatives	Negative	209	179.1	3.79	210.089	[M-H]-	authentic standard	MM4	0.84
pmb0706	Quercetin5-O-malonylhexosyl-hexoside	Flavonol	Positive	713.1	713.1	2.72	712.1	[M+H]+	putatively annotated	MM4	0.92
pma2088	Quercetin-3,4'-O-di-beta-glucopyranoside	Flavonol	Positive	627.1	465.2	4.86	626.1	[M+H]+	putatively annotated	MM4	0.84
pmb0623	6-C-hexosylchrysoeriolO-hexoside	FlavoneC-glycosides	Positive	625.2	398.1	2.84	624.2	[M+H]+	putatively annotated	MM4	0.97
pmb0620	Chrysoeriol6-C-hexoside8-C-hexoside-O-hexoside	FlavoneC-glycosides	Positive	787.1	344.1	2.68	786.1	[M+H]+	putatively annotated	MM4	0.65
pmb3000	ChrysoeriolO-acetylhexoside	Flavone	Negative	503.1	341.3	3.92	504.1	[M-H]-	putatively annotated	MM4	0.93
pmb0566	LuteolinO-hexosyl-O-pentoside	Flavone	Positive	581.2	287.3	3.71	580.2	[M+H]+	putatively annotated	MM4	0.73
pma6199	ChrysinO-hexoside	Flavone	Positive	417.2	255.8	4.87	416.2	[M+H]+	putatively annotated	MM4	0.67
pmb0580	Chrysin5-O-glucoside(Toringin)	Flavone	Positive	417.1	255.7	4.87	416.1	[M+H]+	putatively annotated	MM4	0.67
pme0359	Apigenin5-O-glucoside	Flavone	Positive	433.1	313.1	3.72	432.106	[M+H]+	authentic standard	MM4	0.66
pme3440	Butein	Flavanone	Positive	273.1	137.1	5.34	272.069	[M+H]+	authentic standard	MM4	0.75
pme2993	Scopoletin(7-Hydroxy-5-methoxycoumarin)	Coumarins	Positive	193.1	178.1	4.05	192.042	[M+H]+	authentic standard	MM4	0.77
pma6270	sn-Glycero-3-phosphocholine	Cholines	Positive	258.2	125.2	0.79	258.2	Protonated	putatively annotated	MM4	0.96
pmb1754	O-Phosphocholine	Cholines	Positive	184	83.2	0.79	183	[M+H]+	authentic standard	MM4	0.83
pme1537	(+)-Gallocatechin(GC)	Catechinderivatives	Positive	307	248.1	2.29	306.074	[M+H]+	authentic standard	MM4	0.65
pme3160	D-Glucose6-phosphate	Carbohydrates	Negative	259	96.9	0.71	260.03	[M-H]-	authentic standard	MM4	0.83
pmb3088	Trehalose6-phosphate	Carbohydrates	Negative	421.1	241.2	0.7	422.1	[M-H]-	putatively annotated	MM4	0.75
pma0134	D(-)-Threose	Carbohydrates	Positive	121	77.1	1.19	120	[M+H]+	putatively annotated	MM4	0.67
pmb1318	8-Methyl-2-oxo-4-phenyl-2H-chromen-7-yl4-(hexyloxy)benzoate	Benzoicacidderivatives	Positive	457.2	191.5	4.51	456.2	[M+H]+	putatively annotated	MM4	0.61
pme1090	Glutathionereducedform	Aminoacidderivatives	Positive	308	162	1.14	307.084	[M+H]+	authentic standard	MM4	0.9
pmb2857	L-GlutamicacidO-glucoside	Aminoacidderivatives	Negative	308.1	128.2	0.77	309.1	[M-H]-	putatively annotated	MM4	0.85
pme3179	CYS-GLY	Aminoacidderivatives	Positive	179	75.9	0.84	178.041	[M+H]+	authentic standard	MM4	0.85
pme1712	L-Saccharopine	Aminoacidderivatives	Negative	275	257.1	0.7	276.132	[M-H]-	authentic standard	MM4	0.77
pmb2855	L-GlutamineO-hexside	Aminoacidderivatives	Negative	307	145.2	0.76	308	[M-H]-	putatively annotated	MM4	0.66
pmb0468	N-formylmethionine	Aminoacidderivatives	Positive	178	161.5	1.56	177	[M+H]+	putatively annotated	MM4	0.65
pmb3062	Eudesmoylquinicacid	Quinateanditsderivatives	Negative	385.1	152.2	2.04	386.1	[M-H]-	putatively annotated	MM5	0.94
pme0399	Chlorogenicacid(3-O-Caffeoylquinicacid)	Quinateanditsderivatives	Positive	355.1	355.1	2.65	354.095	[M+H]+	authentic standard	MM5	0.93
pmb3058	QuinicacidO-glucuronicacid	Quinateanditsderivatives	Negative	369	191.1	2.23	370	[M-H]-	putatively annotated	MM5	0.89
pma6460	5-O-p-Coumaroylquinicacid	Quinateanditsderivatives	Negative	337	275.8	3.1	338	[M-H]-	putatively annotated	MM5	0.8
pmb3064	3-O-p-coumaroylquinicacidO-hexoside	Quinateanditsderivatives	Negative	499.2	173.2	2.37	500.2	[M-H]-	putatively annotated	MM5	0.64
pmb0488	Spermidine	Phenolamides	Positive	146.2	72.1	0.6	145.2	[M+H]+	authentic standard	MM5	0.79
pmb0764	4-Methyl-5-thiazoleethanol	Others	Positive	144.1	142.9	2.43	143.1	[M+H]+	putatively annotated	MM5	0.93
pmb0374	Aminopurine	Others	Positive	136.1	119.3	1.76	135.1	[M+H]+	putatively annotated	MM5	0.85
pma6298	3-Hydroxypyridine	Others	Positive	96	80.2	1.13	95	[M+H]+	putatively annotated	MM5	0.7
pme2702	4-Acetamidobutyricacid	Organicacids	Negative	144.1	102	1.57	145.074	[M-H]-	authentic standard	MM5	0.94
pme2603	3-Hydroxyanthranilicacid	Organicacids	Negative	152	108.1	2.51	153.043	[M-H]-	authentic standard	MM5	0.93
pme0245	Adipicacid	Organicacids	Negative	145.1	80.9	2.48	146.058	[M-H]-	authentic standard	MM5	0.88
pme3309	2-Methylglutaricacid	Organicacids	Negative	145.1	101.1	2.45	146.058	[M-H]-	authentic standard	MM5	0.88
pme2009	L-(+)-Tartaricacid	Organicacids	Negative	149	72.8	1.16	150.016	[M-H]-	authentic standard	MM5	0.81
pme0286	2-Hydroxyisocaproicacid	Organicacids	Negative	131.1	85	3.48	132.079	[M-H]-	authentic standard	MM5	0.79
pme2050	Citricacid	Organicacids	Negative	191	131	0.85	192.027	[M-H]-	authentic standard	MM5	0.71
pme2903	4-Hydroxybenzoicacid	Organicacids	Negative	137	92.5	2.89	138.032	[M-H]-	authentic standard	MM5	0.64
pme2776	2'-Deoxyinosine	Nucleotideanditsderivates	Positive	253.1	137.1	1.78	252.086	[M+H]+	authentic standard	MM5	0.94
pmb2684	CyclicAMP	Nucleotideanditsderivates	Negative	328.1	134.2	1.75	329.1	[M-H]-	authentic standard	MM5	0.92
pme0230	Adenosine	Nucleotideanditsderivates	Positive	268.1	136.1	1.78	267.097	[M+H]+	authentic standard	MM5	0.66
pme3209	Genistein7-O-Glucoside(Genistin)	Isoflavone	Negative	431	269.1	3.85	432.106	[M-H]-	authentic standard	MM5	0.91
pmb2991	ApigeninO-hexosyl-O-rutinoside	Flavone	Negative	739.1	269.3	3.74	740.1	[M-H]-	putatively annotated	MM5	0.81
pmb2970	HesperetinO-hexosyl-O-hexoside	Flavanone	Negative	625.2	463.3	2.57	626.2	[M-H]-	putatively annotated	MM5	0.7
pmb2601	7-hydroxycoumarin-beta-rhamnoside	Coumarins	Negative	307.1	161.2	4.31	308.1	[M-H]-	putatively annotated	MM5	0.93
pma2405	Feruloylcholine	Cholines	Positive	280	178.4	2.67	280	Protonated	putatively annotated	MM5	0.75
pme3198	2,4-Dihydroxybenzoicacid	Benzoicacidderivatives	Negative	153	109	2.9	154.027	[M-H]-	authentic standard	MM5	0.81
pme1814	2,5-dihydroxybenzoicacid(Gentisicacid)	Benzoicacidderivatives	Negative	153	108.1	2.34	154.027	[M-H]-	authentic standard	MM5	0.64
pme0066	Guanidineaceticacid	Aminoacidderivatives	Negative	116.1	73.9	0.69	117.054	[M-H]-	authentic standard	MM5	0.93
pme0056	2,3-dimethylsuccinicacid	Aminoacidderivatives	Negative	145.1	101	2.48	146.058	[M-H]-	authentic standard	MM5	0.89
pme0191	N-Glycyl-L-leucine	Aminoacidderivatives	Positive	189.1	86	1.83	188.116	[M+H]+	authentic standard	MM5	0.8
pme2111	L-ascorbate	Vitamins	Negative	175	87	0.9	176.12	[M-H]-	authentic standard	MM6	0.65
pmb0776	N-Feruloyltryptamine	Tryptaminederivatives	Positive	337.1	177.5	2.59	336.1	[M+H]+	putatively annotated	MM6	0.86
pme2024	serotonin	Tryptaminederivatives	Positive	177	160.2	1.56	176.095	[M+H]+	authentic standard	MM6	0.66
pmb0774	N-hydroxytryptamine	Tryptaminederivatives	Positive	177.2	160.5	1.56	176.2	[M+H]+	putatively annotated	MM6	0.65
pmb3075	3-O-p-Coumaroylshikimicacid	Quinateanditsderivatives	Negative	319	145.3	3.93	320	[M-H]-	putatively annotated	MM6	0.65
pma0101	N-Caffeoylagmatine	Phenolamides	Positive	293.2	234.5	2.39	292.2	[M+H]+	putatively annotated	MM6	0.97
pmb0493	N'-p-Coumaroylagmatine	Phenolamides	Positive	277.2	260.8	2.41	276.2	[M+H]+	putatively annotated	MM6	0.95
pmb0502	N-p-Coumaroylspermidine	Phenolamides	Positive	292.1	147.5	1.74	291.1	[M+H]+	putatively annotated	MM6	0.93
pmb0508	N-p-Coumaroylagmatine	Phenolamides	Positive	277.1	147.5	2.51	276.1	[M+H]+	putatively annotated	MM6	0.93
pmb0503	N-(4'-O-glycosyl)-p-coumaroylagmatine	Phenolamides	Positive	439.1	147.4	2.07	438.1	[M+H]+	putatively annotated	MM6	0.91
pma0702	N',N''-disinapoylspermidine	Phenolamides	Positive	558.3	264.8	3.59	557.3	[M+H]+	putatively annotated	MM6	0.78
pmb0496	N-Feruloylagmatine	Phenolamides	Positive	307.2	177.5	2.88	306.2	[M+H]+	putatively annotated	MM6	0.76
pmb0323	N-Caffeoylputrescine	Phenolamides	Positive	251.1	233.5	2.03	250.1	[M+H]+	putatively annotated	MM6	0.73
pme0237	Ethyl3,4-Dihydroxybenzoate(Ethylprotocatechuate)	Organicacids	Positive	183.1	137.1	4.65	182.058	[M+H]+	authentic standard	MM6	0.66
pmb2260	LysoPC15:1	Lipids_Glycerophospholipids	Positive	480.1	184.5	7.66	479.1	[M+H]+	putatively annotated	MM6	0.88
pmb1626	MGMG(18:2)isomer1	Lipids_Glycerolipids	Positive	534.4	262.9	9.15	533.4	[M+H]+	putatively annotated	MM6	0.69
pmb0128	delta-Tridecalactone	Lipids_Fattyacids	Positive	213.3	97.3	4.65	212.3	[M+H]+	putatively annotated	MM6	0.78
pme3230	Calycosin	Isoflavone	Negative	283	268.2	5.02	284.069	[M-H]-	authentic standard	MM6	0.93
pme3251	Glycitein	Isoflavone	Negative	283	268.1	5.01	284.069	[M-H]-	authentic standard	MM6	0.93
pme0388	Homovanillicacid	Hydroxycinnamoylderivatives	Positive	183.1	137.1	3.2	182.058	[M+H]+	authentic standard	MM6	0.75
pma6638	O-methylChrysoeriol7-O-hexoside	Flavone	Positive	477.2	328	5.24	476.2	[M+H]+	putatively annotated	MM6	0.93
pma0253	O-methylChrysoeriol5-O-hexoside	Flavone	Positive	477.1	315.5	5.21	476.1	[M+H]+	putatively annotated	MM6	0.92
pmb2999	Chrysoeriol5-O-hexoside	Flavone	Negative	461.1	285.2	3.82	462.1	[M-H]-	putatively annotated	MM6	0.67
pme3564	Daphnetin	Coumarins	Positive	179	179	3.31	178.027	[M+H]+	authentic standard	MM6	0.89
pme3131	6,7-Dimethoxy-4-methylcoumarin	Coumarins	Positive	221.1	205.1	5.26	220.074	[M+H]+	authentic standard	MM6	0.73
pmb0242	Sinapoylcholine	Cholines	Positive	310	251.6	2.74	310	Protonated	authentic standard	MM6	0.92
pmb0835	Gallocatechin-gallocatechin	Catechinderivatives	Positive	611.2	611.1	2.28	610.2	[M+H]+	putatively annotated	MM6	0.68
pme1516	Epigallocatechin(EGC)	Catechinderivatives	Positive	307	139.1	2.56	306	[M+H]+	authentic standard	MM6	0.67
pmb0247	p-Aminobenzoate	Benzoicacidderivatives	Positive	137.3	94.3	2.89	136.3	[M+H]+	putatively annotated	MM6	0.71
pmb3073	O-p-CoumaroylquinicacidO-rutinosidederivative	Quinateanditsderivatives	Negative	709.1	401.3	3.39	710.1	[M-H]-	putatively annotated	MM7	0.89
pmb0490	N-p-Coumaroylputrescine	Phenolamides	Positive	235.1	147.5	2.2	234.1	[M+H]+	putatively annotated	MM7	0.9
pmb0505	N'-p-Coumaroylputrescine	Phenolamides	Positive	235.1	147.4	2.16	234.1	[M+H]+	putatively annotated	MM7	0.9
pmb0489	N-hexosyl-p-coumaroylputrescine	Phenolamides	Positive	397.1	147.4	1.68	396.1	[M+H]+	putatively annotated	MM7	0.66
pme2366	Phenethylamine	Others	Positive	122.1	105	2.15	121.089	[M+H]+	authentic standard	MM7	0.81
pmb0069	Benzamide	Others	Positive	122	105.3	2.15	121	[M+H]+	putatively annotated	MM7	0.8
pme3511	Orotidine	Others	Negative	287.1	153.1	1.14	288.059	[M-H]-	authentic standard	MM7	0.8
pma0948	Hydroxyphenethylamine	Others	Positive	138.1	77.2	1.21	137.1	[M+H]+	putatively annotated	MM7	0.67
pme2169	Fumaricacid	Organicacids	Negative	115	97.9	1.09	116.011	[M-H]-	authentic standard	MM7	0.83
pme3719	D-Xylonicacid	Organicacids	Negative	165.1	74.9	0.95	166.048	[M-H]-	authentic standard	MM7	0.66
pme3292	Prunetin	Isoflavone	Negative	283	268.1	6.94	284.069	[M-H]-	authentic standard	MM7	0.7
pme1434	Syringin	Hydroxycinnamoylderivatives	Negative	371.1	209.2	2.65	372.142	[M-H]-	authentic standard	MM7	0.91
pmb3013	IsorhamnetinO-acetyl-hexoside	Flavonol	Negative	519.1	315.3	4.35	520.1	[M-H]-	putatively annotated	MM7	0.88
pmb3026	QuercetinO-acetylhexoside	Flavonol	Negative	505.1	301.2	3.92	506.1	[M-H]-	putatively annotated	MM7	0.88
pme3297	Kaempferol3-O-rhamnoside(Kaempferin)	Flavonol	Positive	433	287	4.46	432.106	[M+H]+	authentic standard	MM7	0.84
pme2493	Kaempferol3,7-dirhamnoside(Kaempferitrin)	Flavonol	Positive	579.2	433.1	3.77	578.164	[M+H]+	authentic standard	MM7	0.79
pme1588	Isorhamnetin	Flavonol	Negative	315.1	300.1	5.74	316.058	[M-H]-	authentic standard	MM7	0.78
pmb0709	Quercetin7-O-malonylhexosyl-hexoside	Flavonol	Positive	713.1	303.6	3.45	712.1	[M+H]+	putatively annotated	MM7	0.75
pme0374	Isovitexin	FlavoneC-glycosides	Negative	431.1	431.1	3.73	432.106	[M-H]-	authentic standard	MM7	0.76
pmb3014	LuteolinO-eudesmicacid-O-hexoside	Flavone	Negative	641.1	285.2	4.54	642.1	[M-H]-	putatively annotated	MM7	0.97
pma0760	SelginO-malonylhexoside	Flavone	Positive	565	317.8	4.24	564	[M+H]+	putatively annotated	MM7	0.92
pme1541	Acacetin	Flavone	Negative	283.1	268	6.94	284.069	[M-H]-	authentic standard	MM7	0.7
pme1601	Apigenin4-O-rhamnoside	Flavone	Positive	417.1	270.9	4.88	416.111	[M+H]+	authentic standard	MM7	0.67
pma6558	Velutin	Flavone	Negative	313.1	298.3	7.22	314.1	[M-H]-	putatively annotated	MM7	0.64
pmb3041	TricinO-saccharicacid	Flavone	Negative	521.1	329.3	3.77	522.1	[M-H]-	putatively annotated	MM7	0.6
pmb0686	EriodictyolO-malonylhexoside	Flavanone	Positive	537	289.7	4.41	536	[M+H]+	putatively annotated	MM7	0.75
pma0791	NaringeninO-malonylhexoside	Flavanone	Positive	521	317.6	4.43	520	[M+H]+	putatively annotated	MM7	0.63
pme3705	D-glucoronicacid	Carbohydrates	Negative	193.1	72.9	0.74	194.043	[M-H]-	authentic standard	MM7	0.72
pme1002	L-Tyramine	Aminoacids	Positive	138.1	103	1.21	137.084	[M+H]+	authentic standard	MM7	0.93
pme2743	N-Phenylacetylglycine	Aminoacidderivatives	Positive	194.1	135.1	3.38	193.074	[M+H]+	authentic standard	MM7	0.96
pme3480	Pantetheine	Vitamins	Positive	279.1	149.2	2.68	278.13	[M+H]+	authentic standard	MM8	0.74
pmb3059	QuinicacidO-di-glucuronicacid	Quinateanditsderivatives	Negative	543.1	191.2	1.75	544.1	[M-H]-	putatively annotated	MM8	0.62
pmb0492	N',N",N"'-p-coumaroyl-cinnamoyl-caffeoylspermidine	Phenolamides	Positive	584.2	325.8	2.28	583.2	[M+H]+	putatively annotated	MM8	0.75
pma0584	N-Caffeoylspermidine	Phenolamides	Positive	308.2	220.5	1.28	307.2	[M+H]+	putatively annotated	MM8	0.62
pme0028	Uridine	Nucleotideanditsderivates	Positive	245.1	113	1.21	244.07	[M+H]+	authentic standard	MM8	0.65
pmb0890	MAG(18:2)	Lipids_Glycerolipids	Positive	355.1	337.9	10.4	354.1	[M+H]+	putatively annotated	MM8	0.71
pmb1562	MAG(18:4)isomer3	Lipids_Glycerolipids	Positive	351	259.9	7.68	350	[M+H]+	putatively annotated	MM8	0.66
pmb2251	DGMG(18:1)	Lipids_Glycerolipids	Positive	694.1	335.8	7.46	693.1	[M+H]+	putatively annotated	MM8	0.6
pmb2787	9-KODE	Lipids_Fattyacids	Negative	293.2	249.9	9.06	294.2	[M-H]-	putatively annotated	MM8	0.95
pma0461	14,15-Dehydrocrepenynicacid	Lipids_Fattyacids	Positive	277.2	157.4	8.47	276.2	[M+H]+	putatively annotated	MM8	0.91
pmb2467	α-Linolenicacid	Lipids_Fattyacids	Positive	279.2	201.5	10.5	278.2	[M+H]+	authentic standard	MM8	0.88
pmb2789	13-HpOTrE(r)	Lipids_Fattyacids	Negative	309	291.5	7.8	310	[M-H]-	putatively annotated	MM8	0.88
pmb2799	12,13-EODE	Lipids_Fattyacids	Negative	295	277.5	9.62	296	[M-H]-	putatively annotated	MM8	0.88
pmb0889	Punicicacid	Lipids_Fattyacids	Positive	279.3	201.5	8.84	278.3	[M+H]+	putatively annotated	MM8	0.86
pmb1574	Octadecadien-6-ynoicacid	Lipids_Fattyacids	Positive	277.2	137.5	8.04	276.2	[M+H]+	putatively annotated	MM8	0.84
pmb2778	9,10-EODE	Lipids_Fattyacids	Negative	295	183.3	8.84	296	[M-H]-	putatively annotated	MM8	0.83
pma3606	9-Hydroxy-(10E,12Z,15Z)-octadecatrienoicacid	Lipids_Fattyacids	Positive	295.2	179.5	9.1	294.2	[M+H]+	putatively annotated	MM8	0.74
pmb2786	9-HOTrE	Lipids_Fattyacids	Negative	293	275.4	8.29	294	[M-H]-	putatively annotated	MM8	0.69
pmb2791	9-HpOTrE	Lipids_Fattyacids	Negative	309.1	291.4	7.43	310.1	[M-H]-	putatively annotated	MM8	0.66
pme0543	Indole-5-carboxylicacid	Indolederivatives	Negative	160.1	116	4.3	161.048	[M-H]-	authentic standard	MM8	0.71
pmb3031	TricinO-glycerol	Flavone	Negative	403.1	328.2	5.2	404.1	[M-H]-	putatively annotated	MM8	0.82
pme3422	6-Methoxy-7,8-DihydroxyCoumarin	Coumarins	Negative	207.1	192	3.48	208.037	[M-H]-	authentic standard	MM8	0.82
pme1162	Gallicacid	Benzoicacidderivatives	Negative	169	122.8	1.7	170.022	[M-H]-	authentic standard	MM8	0.83
pme3576	Anthranilicacid	Benzoicacidderivatives	Positive	138.1	91.9	3.98	137.048	[M+H]+	authentic standard	MM8	0.77
pme0310	Ethylgallate	Benzoicacidderivatives	Negative	197.1	124.1	3.73	198.053	[M-H]-	authentic standard	MM8	0.71
pme0020	L-Phenylalanine	Aminoacids	Negative	164.1	147.1	1.85	165.079	[M-H]-	authentic standard	MM8	0.81
pme2698	Phe-Phe	Aminoacidderivatives	Positive	313.4	120	3.53	312.147	[M+H]+	authentic standard	MM8	0.86
pme1313	N'-Formylkynurenine	Aminoacidderivatives	Positive	237.1	146.1	1.93	236.08	[M+H]+	authentic standard	MM8	0.66
pmb0769	N-hexosyl-p-coumaroylserotonin	Tryptaminederivatives	Positive	485.1	147.5	3.83	484.1	[M+H]+	putatively annotated	MM9	0.6
pme2184	Nomilin	Terpenoids	Positive	515.2	411.2	6.77	514.22	[M+H]+	authentic standard	MM9	0.97
pma0110	O-Sinapoylquinicacid	Quinateanditsderivatives	Positive	399	207.5	2.89	398	[M+H]+	putatively annotated	MM9	0.78
pmb0302	2-Aminoethylphosphonate	Others	Positive	126.1	97.3	3.6	125.1	[M+H]+	putatively annotated	MM9	0.74
pme0048	2-Aminoethanesulfinicacid	Organicacids	Negative	108	63.7	0.74	109.02	[M-H]-	authentic standard	MM9	0.81
pme0486	Methylmalonicacid	Organicacids	Negative	117	100	1.33	118.027	[M-H]-	authentic standard	MM9	0.77
pme3096	Aminomalonicacid	Organicacids	Negative	118	73.9	1.33	119.022	[M-H]-	authentic standard	MM9	0.75
pme2541	α-Hydroxyisobutyricacid	Organicacids	Negative	103	56.8	1.55	104.047	[M-H]-	authentic standard	MM9	0.71
pme1711	3-Hydroxy-3-methylbutyricacid	Organicacids	Negative	117.1	99.9	1.96	118.063	[M-H]-	authentic standard	MM9	0.69
pme2049	2-Hydroxybutanoicacid	Organicacids	Negative	103	56.8	1.54	104.047	[M-H]-	authentic standard	MM9	0.65
pme2241	Citraconicacid	Organicacids	Negative	129	84.9	1.6	130.027	[M-H]-	authentic standard	MM9	0.64
pme1376	2'-Deoxycytidine-5'-monophosphate	Nucleotideanditsderivates	Positive	308	112	1.25	307.057	[M+H]+	authentic standard	MM9	0.83
pme3838	Guanosine3',5'-cyclicmonophosphate	Nucleotideanditsderivates	Positive	346.2	152	1.61	345.047	[M+H]+	authentic standard	MM9	0.76
pmb0165	LysoPC16:1	Lipids_Glycerophospholipids	Positive	494.3	476.6	8.48	493.3	[M+H]+	authentic standard	MM9	0.78
pmb1270	Tricin4'-O-(β-guaiacylglyceryl)ether5-O-hexosyl-O-hexoside	Flavonolignan	Positive	851.6	331.9	3.97	850.6	[M+H]+	putatively annotated	MM9	0.63
pme3468	Kaempferol-3-O-robinoside-7-O-rhamnoside(Robinin)	Flavonol	Negative	739.2	593.3	3.25	740.216	[M-H]-	authentic standard	MM9	0.61
pma6516	C-hexosyl-apigeninO-hexosyl-O-hexoside	FlavoneC-glycosides	Positive	757.3	450.1	3.44	756.3	[M+H]+	putatively annotated	MM9	0.95
pma6254	C-hexosyl-apigeninO-caffeoylhexoside	FlavoneC-glycosides	Positive	757.3	757.2	3.54	756.3	[M+H]+	putatively annotated	MM9	0.94
pmb0660	C-hexosyl-luteolinO-p-coumaroylhexoside	FlavoneC-glycosides	Positive	757.2	757	3.63	756.2	[M+H]+	putatively annotated	MM9	0.77
pmb0647	8-C-hexosyl-luteolinO-pentoside	FlavoneC-glycosides	Positive	581.1	449.2	3.38	580.1	[M+H]+	putatively annotated	MM9	0.7
pmb0629	Chrysoeriol6-C-hexoside	FlavoneC-glycosides	Positive	463.1	379.6	3	462.1	[M+H]+	putatively annotated	MM9	0.61
pmb0579	ChrysoeriolO-sinapoylhexoside	Flavone	Positive	669	301.6	4.83	668	[M+H]+	putatively annotated	MM9	0.82
pme1611	Isohemiphloin	Flavone	Negative	433.1	433	3.67	434.121	[M-H]-	authentic standard	MM9	0.66
pme3553	Psoralen	Coumarins	Positive	187	131	5.82	186.032	[M+H]+	authentic standard	MM9	0.94
pme3416	Esculetin(6,7-dihydroxycoumarin)	Coumarins	Negative	177	133.1	3.04	178.027	[M-H]-	authentic standard	MM9	0.86
pmb0563	Peonidin	Anthocyanins	Positive	301.1	273.6	3.98	301.1	Protonated	putatively annotated	MM2	0.89
pmb2957	CyanidinO-syringicacid	Anthocyanins	Negative	465.1	285.3	2.42	466.1	[M-H]-	putatively annotated	MM3	0.81
pme1419	L-Methioninemethylester	Aminoacidderivatives	Positive	164	61	1.74	163	[M+H]+	authentic standard	MM9	0.79
pme0118	Pyrrole-2-carboxylicacid	Aminoacidderivatives	Negative	110.1	65.9	2.76	111.032	[M-H]-	authentic standard	MM9	0.74
pme1952	Riboflavin	Vitamins	Positive	377	243.2	3.2	376.138	[M+H]+	authentic standard	MM19	0.68
pme0435	ProcyanidinB2	Proanthocyanidins	Positive	579.1	127.3	2.71	578.142	[M+H]+	authentic standard	MM19	0.84
pme0436	ProcyanidinB3	Proanthocyanidins	Negative	577.1	407.3	2.78	578.142	[M-H]-	authentic standard	MM19	0.8
pme3279	2'-Hydroxygenistein	Isoflavone	Positive	287	217.1	4.84	286.048	[M+H]+	authentic standard	MM19	0.8
pme1572	Orobol(5,7,3',4'-tetrahydroxyisoflavone)	Isoflavone	Positive	287	241.1	4.83	286.048	[M+H]+	authentic standard	MM19	0.79
pme0361	Quercetin3-alpha-L-arabinofuranoside(Avicularin)	Flavonol	Positive	435.1	303	3.95	434.085	[M+H]+	authentic standard	MM19	0.76
pme0089	Luteolin	Flavone	Positive	287.1	287.1	4.92	286.1	[M+H]+	authentic standard	MM19	0.81
pme2984	Isosakuranetin-7-neohesperidoside(Poncirin)	Flavanone	Negative	593	285.2	4.81	594.195	[M-H]-	authentic standard	MM19	0.92
pme0201	Catechin	Catechinderivatives	Positive	291.1	139.1	2.74	290.079	[M+H]+	authentic standard	MM19	0.81
pmb3114	Epicatechin-epiafzelechin	Catechinderivatives	Negative	561.1	271.3	3.45	562.1	[M-H]-	putatively annotated	MM19	0.67
pme1846	D(+)-Glucose	Carbohydrates	Negative	179	70.9	0.74	180.063	[M-H]-	authentic standard	MM19	0.66
pmb2673	3-(6-Hydroxy-3,4-dioxo-1,5-cyclohexadien-1-yl)-L-alanine	Aminoacidderivatives	Negative	210.1	135.2	1.44	211.1	[M-H]-	putatively annotated	MM19	0.75
pmb0037	Hordenine	Alkaloids	Positive	166.1	121.4	1.48	165.1	[M+H]+	putatively annotated	MM19	0.78
mws2218	Caffeine	Alkaloids	Positive	195.08	83	3.03	194.08	[M+H]+	authentic standard	UNCLASSIFIED	NA
mws2220	Gallocatechin gallate，GCG	Catechin derivatives	Positive	459.085	151	3.26	458.085	[M+H]+	authentic standard	UNCLASSIFIED	NA
mws2221	Catechin gallate，CG	Catechin derivatives	Positive	443.09	272.8	3.8	442.09	[M+H]+	authentic standard	UNCLASSIFIED	NA
pma0104	N-sinapoylhydroxycoumarin	Coumarins	Positive	369.1	207.5	3.76	368.1	[M+H]+	putatively annotated	UNCLASSIFIED	NA
pma0675	o-Anisicacid	Organicacids	Positive	153	135.3	2.99	152	[M+H]+	putatively annotated	UNCLASSIFIED	NA
pma0795	TricetinO-malonylhexoside	Flavone	Positive	551	347.4	4.45	550	[M+H]+	putatively annotated	UNCLASSIFIED	NA
pma1087	C-pentosyl-C-hexosyl-apigenin	FlavoneC-glycosides	Positive	565.2	499.3	3.67	564.2	[M+H]+	putatively annotated	UNCLASSIFIED	NA
pma1303	LysoPC16:2	Lipids_Glycerophospholipids	Positive	492.3	337.7	8.51	491.3	[M+H]+	putatively annotated	UNCLASSIFIED	NA
pma1751	Nicotinicacid-hexoside	Nicotinicacidderivatives	Positive	286	124.3	1.89	285	[M+H]+	putatively annotated	UNCLASSIFIED	NA
pma1839	N-sinapoylcadaverine	Phenolamides	Positive	309	147.5	2.76	308	[M+H]+	putatively annotated	UNCLASSIFIED	NA
pma2172	Cinnamoyltyramine	Tryptaminederivatives	Positive	268	131.3	5.91	267	[M+H]+	putatively annotated	UNCLASSIFIED	NA
pma2681	Xanthurenicacid	Organicacids	Positive	206.1	132.4	2.03	205.1	[M+H]+	putatively annotated	UNCLASSIFIED	NA
pma2987	Histidinol	Others	Positive	142.1	82.9	0.61	141.1	[M+H]+	putatively annotated	UNCLASSIFIED	NA
pma3101	Nicotinateribonucleoside	Nicotinicacidderivatives	Positive	256.2	124	0.82	255.2	[M+H]+	putatively annotated	UNCLASSIFIED	NA
pma3443	Tricin7-O-acetylglucoside	Flavone	Positive	535.3	487.2	5.7	534.3	[M+H]+	putatively annotated	UNCLASSIFIED	NA
pma3649	5-Aminolevulinate	Organicacids	Positive	132.1	86.2	0.97	131.1	[M+H]+	putatively annotated	UNCLASSIFIED	NA
pma6218	O-methylnaringeninC-pentoside	FlavoneC-glycosides	Positive	419.1	383.9	3.81	418.1	[M+H]+	putatively annotated	UNCLASSIFIED	NA
pma6389	Ayanin	Flavonol	Positive	345.2	177.5	6.22	344.2	[M+H]+	putatively annotated	UNCLASSIFIED	NA
pma6455	Ribulose-5-phosphate	Carbohydrates	Negative	229	157.1	1.05	230	[M-H]-	putatively annotated	UNCLASSIFIED	NA
pma6496	Luteolin6-C-glucoside	FlavoneC-glycosides	Positive	449.1	300	3.42	448.1	[M+H]+	putatively annotated	UNCLASSIFIED	NA
pma6515	C-hexosyl-chrysinO-feruloylhexoside	FlavoneC-glycosides	Positive	755.2	332.1	4.58	754.2	[M+H]+	putatively annotated	UNCLASSIFIED	NA
pma6599	6-Hydroxymethylherniarin	Hydroxycinnamoylderivatives	Positive	207.1	147.4	3.19	206.1	[M+H]+	putatively annotated	UNCLASSIFIED	NA
pma6625	E-3,4,5'-Trihydroxy-3'-glucopyranosylstilbene	Others	Negative	405.1	242.2	4.55	406.1	[M-H]-	putatively annotated	UNCLASSIFIED	NA
pmb0064	DIMBOAglucoside	Others	Positive	374.1	198.6	2.01	373.1	[M+H]+	putatively annotated	UNCLASSIFIED	NA
pmb0142	Caffeicaldehyde	Hydroxycinnamoylderivatives	Positive	165.1	95.5	5.92	164.1	[M+H]+	putatively annotated	UNCLASSIFIED	NA
pmb0159	DGMG(18:2)isomer2	Lipids_Glycerolipids	Positive	696.4	696.2	7.46	695.4	[M+H]+	putatively annotated	UNCLASSIFIED	NA
pmb0160	MAG(18:3)isomer5	Lipids_Glycerolipids	Positive	353.3	261.8	7.46	352.3	[M+H]+	putatively annotated	UNCLASSIFIED	NA
pmb0163	DGMG(18:2)isomer3	Lipids_Glycerolipids	Positive	696.4	696.3	8.24	695.4	[M+H]+	putatively annotated	UNCLASSIFIED	NA
pmb0164	MAG(18:2)isomer1	Lipids_Glycerolipids	Positive	355.1	263.8	8.38	354.1	[M+H]+	putatively annotated	UNCLASSIFIED	NA
pmb0168	PC16:1/14:1	Lipids_Glycerophospholipids	Positive	700.1	184.4	9.2	699.1	[M+H]+	putatively annotated	UNCLASSIFIED	NA
pmb0287	MAG(18:4)isomer2	Lipids_Glycerolipids	Positive	351.4	277.8	7.28	350.4	[M+H]+	putatively annotated	UNCLASSIFIED	NA
pmb0292	Cholesterol	Others	Positive	387.1	331.8	7.52	386.1	[M+H]+	putatively annotated	UNCLASSIFIED	NA
pmb0296	MAG(18:1)isomer2	Lipids_Glycerolipids	Positive	357.2	339.9	8.8	356.2	[M+H]+	putatively annotated	UNCLASSIFIED	NA
pmb0382	O-Feruloyl4-hydroxylcoumarin	Coumarins	Positive	339.1	177.5	3.8	338.1	[M+H]+	putatively annotated	UNCLASSIFIED	NA
pmb0426	5-Methoxy-N,N-dimethyltryptamine	Tryptaminederivatives	Positive	219.1	189.5	3.76	218.1	[M+H]+	putatively annotated	UNCLASSIFIED	NA
pmb0449	2-Aminoadipicacid(L-Homoglutamicacid)	Aminoacids	Positive	162.1	98.3	0.8	161.1	[M+H]+	putatively annotated	UNCLASSIFIED	NA
pmb0464	Asparticaciddi-O-glucoside	Aminoacidderivatives	Positive	458.1	116.4	0.79	457.1	[M+H]+	putatively annotated	UNCLASSIFIED	NA
pmb0494	N-Sinapoylputrescine	Phenolamides	Positive	295	207.6	2.56	294	[M+H]+	putatively annotated	UNCLASSIFIED	NA
pmb0569	Syringetin5-O-hexoside	Flavone	Positive	509.2	347.6	4.08	508.2	[M+H]+	putatively annotated	UNCLASSIFIED	NA
pmb0576	ApigeninO-malonylhexoside	Flavone	Positive	519	271.7	4.41	518	[M+H]+	putatively annotated	UNCLASSIFIED	NA
pmb0601	ChrysoeriolO-hexosyl-O-pentoside	Flavone	Positive	595.1	301.8	4.06	594.1	[M+H]+	putatively annotated	UNCLASSIFIED	NA
pmb0602	Syringetin7-O-hexoside	Flavone	Positive	509.3	283.6	4.07	508.3	[M+H]+	putatively annotated	UNCLASSIFIED	NA
pmb0604	Kaempferol3-O-glucoside(Astragalin)	Flavonol	Positive	449.1	287.6	4.05	448.1	[M+H]+	authentic standard	UNCLASSIFIED	NA
pmb0608	ChrysoeriolO-malonylhexoside	Flavone	Positive	549.1	301.7	4.48	548.1	[M+H]+	putatively annotated	UNCLASSIFIED	NA
pmb0618	8-C-hexosyl-hesperetinO-hexoside	FlavoneC-glycosides	Positive	627.1	430	2.61	626.1	[M+H]+	putatively annotated	UNCLASSIFIED	NA
pmb0631	C-hexosyl-luteolinC-pentoside	FlavoneC-glycosides	Positive	581.1	467.9	3.09	580.1	[M+H]+	putatively annotated	UNCLASSIFIED	NA
pmb0644	LuteolinC-hexoside	FlavoneC-glycosides	Positive	449.1	329.6	3.42	448.1	[M+H]+	putatively annotated	UNCLASSIFIED	NA
pmb0645	6-C-hexosyl-hesperetinO-hexoside	FlavoneC-glycosides	Positive	627.1	447.3	3.35	626.1	[M+H]+	putatively annotated	UNCLASSIFIED	NA
pmb0652	C-hexosyl-apigeninO-pentoside	FlavoneC-glycosides	Positive	565.1	397.8	3.47	564.1	[M+H]+	putatively annotated	UNCLASSIFIED	NA
pmb0654	Apigenindi-C,C-pentoside	FlavoneC-glycosides	Positive	535.1	482.4	3.54	534.1	[M+H]+	putatively annotated	UNCLASSIFIED	NA
pmb0663	8-C-hexosyl-luteolinO-hexoside	FlavoneC-glycosides	Positive	611.1	299.8	3.79	610.1	[M+H]+	putatively annotated	UNCLASSIFIED	NA
pmb0665	Luteolin8-C-hexosyl-O-hexoside	FlavoneC-glycosides	Positive	611.2	299.8	3.66	610.2	[M+H]+	putatively annotated	UNCLASSIFIED	NA
pmb0681	Apigenin8-C-pentoside	FlavoneC-glycosides	Positive	403.1	367.6	4.19	402.1	[M+H]+	putatively annotated	UNCLASSIFIED	NA
pmb0693	C-hexosyl-apigeninC-pentoside	FlavoneC-glycosides	Positive	565.1	481.7	3.35	564.1	[M+H]+	putatively annotated	UNCLASSIFIED	NA
pmb0721	TricinO-feruloylhexosideO-hexoside	Flavone	Positive	831.1	331.7	4.72	830.1	[M+H]+	putatively annotated	UNCLASSIFIED	NA
pmb0723	Tricin4'-O-(β-guaiacylglyceryl)etherO-hexoside	Flavonolignan	Positive	689.2	329.8	4.92	688.2	[M+H]+	putatively annotated	UNCLASSIFIED	NA
pmb0751	5-O-p-Coumaroylshikimicacid	Quinateanditsderivatives	Positive	321.1	147.5	3.75	320.1	[M+H]+	putatively annotated	UNCLASSIFIED	NA
pmb0766	Azoxystrobinacid	Others	Positive	390.4	284.9	6.97	389.4	[M+H]+	putatively annotated	UNCLASSIFIED	NA
pmb0767	D-erythro-Dihydrosphingosine	Others	Positive	302.4	284.9	7.38	301.4	[M+H]+	putatively annotated	UNCLASSIFIED	NA
pmb0770	N-Feruloylserotonin	Tryptaminederivatives	Positive	353.1	177.5	4.7	352.1	[M+H]+	putatively annotated	UNCLASSIFIED	NA
pmb0782	Piperidine	Alkaloids	Positive	86.1	56	1.16	85.1	[M+H]+	putatively annotated	UNCLASSIFIED	NA
pmb0789	PyridoxineO-glucoside	Vitamins	Positive	332.1	314.7	1.14	331.1	[M+H]+	putatively annotated	UNCLASSIFIED	NA
pmb0800	Niacinamide	Vitamins	Positive	123.1	80.3	1.49	122.1	[M+H]+	authentic standard	UNCLASSIFIED	NA
pmb0813	1-Methoxyindole-3-carbaldehyde	Indolederivatives	Positive	176.1	133.5	4.34	175.1	[M+H]+	putatively annotated	UNCLASSIFIED	NA
pmb0819	3-Indoleacetonitrile	Indolederivatives	Positive	157	130.4	2.3	156	[M+H]+	putatively annotated	UNCLASSIFIED	NA
pmb0829	Phosphoricacid	Organicacids	Positive	98.9	81.1	0.9	97.9	[M+H]+	putatively annotated	UNCLASSIFIED	NA
pmb0863	LysoPC16:2(2nisomer)	Lipids_Glycerophospholipids	Positive	492.3	184.5	7.21	491.3	[M+H]+	putatively annotated	UNCLASSIFIED	NA
pmb0880	LysoPE18:0(2nisomer)	Lipids_Glycerophospholipids	Positive	482.1	314	8.92	481.1	[M+H]+	putatively annotated	UNCLASSIFIED	NA
pmb0962	Lysinebutyrate	Aminoacidderivatives	Positive	235.1	118.4	0.76	234.1	[M+H]+	putatively annotated	UNCLASSIFIED	NA
pmb1178	O-Feruloyl2-hydroxylcoumarin	Coumarins	Positive	339.1	177.5	3.27	338.1	[M+H]+	putatively annotated	UNCLASSIFIED	NA
pmb1452	N-Lauryldiethanolamine	Others	Positive	275.1	258.1	5.98	274.1	[M+H]+	putatively annotated	UNCLASSIFIED	NA
pmb1490	OryzalexinE	Terpenoids	Positive	305.1	131.4	6.53	304.1	[M+H]+	putatively annotated	UNCLASSIFIED	NA
pmb1605	MAG(18:3)isomer3	Lipids_Glycerolipids	Positive	353.3	335.8	8.55	352.3	[M+H]+	putatively annotated	UNCLASSIFIED	NA
pmb1650	Octadeca-11E,13E,15Z-trienoicacid	Lipids_Fattyacids	Positive	279.2	149.4	9.59	278.2	[M+H]+	putatively annotated	UNCLASSIFIED	NA
pmb1652	Phthalicanhydride	Others	Positive	149	121.3	9.59	148	[M+H]+	putatively annotated	UNCLASSIFIED	NA
pmb2211	Cocamidopropylbetaine	Others	Positive	343.1	240.9	6.46	342.1	[M+H]+	putatively annotated	UNCLASSIFIED	NA
pmb2221	4-Hydroxysphinganine	Lipids_Fattyacids	Positive	318.3	300.9	6.86	317.3	[M+H]+	putatively annotated	UNCLASSIFIED	NA
pmb2222	PhytocassaneC	Terpenoids	Positive	319.1	301.9	6.86	318.1	[M+H]+	putatively annotated	UNCLASSIFIED	NA
pmb2228	LysoPC19:0	Lipids_Glycerophospholipids	Positive	538.1	184.5	6.89	537.1	[M+H]+	putatively annotated	UNCLASSIFIED	NA
pmb2325	MAG(18:3)isomer2	Lipids_Glycerolipids	Positive	353.1	261.8	8.29	352.1	[M+H]+	putatively annotated	UNCLASSIFIED	NA
pmb2363	MAG(18:1)isomer1	Lipids_Glycerolipids	Positive	357.2	339.9	8.65	356.2	[M+H]+	putatively annotated	UNCLASSIFIED	NA
pmb2383	MGMG(18:2)isomer2	Lipids_Glycerolipids	Positive	534.1	338	8.9	533.1	[M+H]+	putatively annotated	UNCLASSIFIED	NA
pmb2507	2-Deoxyribose1-phosphate	Carbohydrates	Negative	213.1	78.9	0.97	214.1	[M-H]-	putatively annotated	UNCLASSIFIED	NA
pmb2636	8,15-DiHETE	Lipids_Fattyacids	Negative	335.1	253.3	6.89	336.1	[M-H]-	putatively annotated	UNCLASSIFIED	NA
pmb2640	Lauricacid(C12:0)	Lipids_Fattyacids	Negative	199	181.3	9.53	200	[M-H]-	authentic standard	UNCLASSIFIED	NA
pmb2653	D(+)-MelezitoseO-rhamnoside	Carbohydrates	Negative	649.1	503.3	0.77	650.1	[M-H]-	putatively annotated	UNCLASSIFIED	NA
pmb2792	13-HOTrE(r)	Lipids_Fattyacids	Negative	293	193.2	7.69	294	[M-H]-	putatively annotated	UNCLASSIFIED	NA
pmb2804	13-HPODE	Lipids_Fattyacids	Negative	311.1	293.4	7.84	312.1	[M-H]-	putatively annotated	UNCLASSIFIED	NA
pmb2831	ProtocatechuicacidO-glucoside	Catechinderivatives	Negative	315.1	153.2	2.33	316.1	[M-H]-	putatively annotated	UNCLASSIFIED	NA
pmb2849	Camptothecin	Alkaloids	Negative	347.1	319.3	4.5	348.1	[M-H]-	putatively annotated	UNCLASSIFIED	NA
pmb2871	2,5-dihydroxybenzoicacidO-hexside	Benzoicacidderivatives	Negative	315.1	152.1	1.8	316.1	[M-H]-	putatively annotated	UNCLASSIFIED	NA
pmb2873	3-(2-Naphthyl)-D-alanine	Aminoacidderivatives	Negative	214.1	134.2	3.66	215.1	[M-H]-	putatively annotated	UNCLASSIFIED	NA
pmb2928	GallicacidO-Hexoside	Benzoicacidderivatives	Negative	331	313.7	1.94	332	[M-H]-	putatively annotated	UNCLASSIFIED	NA
pmb2933	Caftaricacid	Hydroxycinnamoylderivatives	Negative	311.1	149.2	2.06	312.1	[M-H]-	putatively annotated	UNCLASSIFIED	NA
pmb0541	Cyanidin3-O-glucosyl-malonylglucoside	Anthocyanins	Positive	697.1	696.9	2.17	697.1	Protonated	putatively annotated	MM9	0.97
pmb2987	AcacetinO-acetylhexoside	Flavone	Negative	487.1	283.2	2.46	488.1	[M-H]-	putatively annotated	UNCLASSIFIED	NA
pmb2992	AcacetinO-glucuronicacid	Flavone	Negative	459.1	283.2	3.73	460.1	[M-H]-	putatively annotated	UNCLASSIFIED	NA
pmb3012	Chrysoeriol7-O-hexoside	Flavone	Negative	461.1	460.9	4.28	462.1	[M-H]-	putatively annotated	UNCLASSIFIED	NA
pmb3053	TricinO-eudesmicacid	Flavone	Negative	523.1	329.3	5.89	524.1	[M-H]-	putatively annotated	UNCLASSIFIED	NA
pmb3055	p-CoumaroylquinicacidO-glucuronicacid	Quinateanditsderivatives	Negative	513.1	191.2	1.86	514.1	[M-H]-	putatively annotated	UNCLASSIFIED	NA
pmb3081	GlucarateO-Phosphoricacid	Carbohydrates	Negative	289.1	97	1.1	290.1	[M-H]-	putatively annotated	UNCLASSIFIED	NA
pmb3099	Diethylphosphate	Organicacids	Negative	153	78.9	1.57	154	[M-H]-	putatively annotated	UNCLASSIFIED	NA
pmb3264	Glutathioneoxidized	Aminoacidderivatives	Negative	611.1	306.2	1.14	612.1	[M-H]-	authentic standard	UNCLASSIFIED	NA
pmc0066	2'-Deoxyinosine-5'-monophosphate	Nucleotideanditsderivates	Positive	333.1	137	0.7	332.1	[M+H]+	putatively annotated	UNCLASSIFIED	NA
pmc0274	6-Methylmercaptopurine	Nucleotideanditsderivates	Positive	167.1	121	1.7	166.1	[M+H]+	putatively annotated	UNCLASSIFIED	NA
pmc0281	AdenosineO-ribose	Nucleotideanditsderivates	Positive	400.2	136.1	1.88	399.2	[M+H]+	putatively annotated	UNCLASSIFIED	NA
pme0001	Hesperetin7-O-neohesperidoside(Neohesperidin)	Flavanone	Negative	609.2	301.3	3.99	610.19	[M-H]-	authentic standard	UNCLASSIFIED	NA
pme0004	L-Homocitrulline	Aminoacids	Positive	190.1	84	0.83	189.111	[M+H]+	authentic standard	UNCLASSIFIED	NA
pme0005	Purine	Nucleotideanditsderivates	Positive	121	121	1.42	120.044	[M+H]+	authentic standard	UNCLASSIFIED	NA
pme0012	L-Asparticacid	Aminoacids	Positive	134.1	74	0.8	133.037	[M+H]+	authentic standard	UNCLASSIFIED	NA
pme0014	L-Glutamicacid	Aminoacids	Positive	148.1	83.9	0.81	147.053	[M+H]+	authentic standard	UNCLASSIFIED	NA
pme0016	L-(-)-Cystine	Aminoacids	Positive	241	119.9	0.82	240.024	[M+H]+	authentic standard	UNCLASSIFIED	NA
pme0018	L-Leucine	Aminoacids	Negative	130.1	130.1	1.24	131.095	[M-H]-	authentic standard	UNCLASSIFIED	NA
pme0025	L-Kynurenine	Aminoacidderivatives	Positive	209.1	146.1	1.87	208.085	[M+H]+	authentic standard	UNCLASSIFIED	NA
pme0032	Hypoxanthine	Nucleotideanditsderivates	Negative	135	92	1.29	136.038	[M-H]-	authentic standard	UNCLASSIFIED	NA
pme0039	L-Valine	Aminoacids	Positive	118.1	71.8	0.84	117.079	[M+H]+	authentic standard	UNCLASSIFIED	NA
pme0040	Adenine	Nucleotideanditsderivates	Positive	136.1	136.1	1.14	135.054	[M+H]+	authentic standard	UNCLASSIFIED	NA
pme0041	L-Isoleucine	Aminoacids	Positive	132	85.9	1.2	131.095	[M+H]+	authentic standard	UNCLASSIFIED	NA
pme0057	DL-homocysteine	Aminoacids	Positive	136	89.9	0.84	135.035	[M+H]+	authentic standard	UNCLASSIFIED	NA
pme0075	N-Acetyl-L-glutamicacid	Aminoacidderivatives	Negative	188.1	102	1.16	189.064	[M-H]-	authentic standard	UNCLASSIFIED	NA
pme0080	CucurbitacinB	Terpenoids	Negative	557.3	539.3	6.9	558.319	[M-H]-	authentic standard	UNCLASSIFIED	NA
pme0109	(-)-3-(3,4-Dihydroxyphenyl)-2-methylalanine	Aminoacidderivatives	Positive	212.2	166.1	1.22	211.084	[M+H]+	authentic standard	UNCLASSIFIED	NA
pme0120	5-Aminovalericacid	Aminoacidderivatives	Positive	118.2	101	0.83	117.079	[M+H]+	authentic standard	UNCLASSIFIED	NA
pme0122	N6-Acetyl-L-lysine	Aminoacidderivatives	Positive	189.2	84	1.02	188.116	[M+H]+	authentic standard	UNCLASSIFIED	NA
pme0123	Glycyl-L-proline	Aminoacidderivatives	Negative	171.2	114	0.83	172.085	[M-H]-	authentic standard	UNCLASSIFIED	NA
pme0137	Nα-Acetyl-L-glutamine	Aminoacidderivatives	Negative	187.2	127.1	1.18	188.08	[M-H]-	authentic standard	UNCLASSIFIED	NA
pme0163	β-Nicotinamidemononucleotide	Nucleotideanditsderivates	Positive	335.1	122.8	0.8	334.057	[M+H]+	authentic standard	UNCLASSIFIED	NA
pme0164	N-γ-Acetyl-N-2-Formyl-5-methoxykynurenamine	Aminoacidderivatives	Negative	263.1	189	3.78	264.111	[M-H]-	authentic standard	UNCLASSIFIED	NA
pme0173	N-Propionylglycine	Aminoacidderivatives	Negative	130.1	73.8	1.28	131.058	[M-H]-	authentic standard	UNCLASSIFIED	NA
pme0181	1-Methylhistidine	Aminoacidderivatives	Positive	170.1	124.1	0.79	169.085	[M+H]+	authentic standard	UNCLASSIFIED	NA
pme0196	Kaempferol	Flavonol	Negative	285	214	5.64	286.048	[M-H]-	authentic standard	UNCLASSIFIED	NA
pme0207	3-Hydroxybutyrate	Organicacids	Negative	103	103	1.39	104.047	[M-H]-	authentic standard	UNCLASSIFIED	NA
pme0208	Amentoflavone	Flavone	Negative	537.1	537	5.9	538.09	[M-H]-	authentic standard	UNCLASSIFIED	NA
pme0234	Kynurenicacid	Organicacids	Positive	190	144	2.52	189.043	[M+H]+	authentic standard	UNCLASSIFIED	NA
pme0238	2–furanoicacid	Organicacids	Positive	113	94.9	2.01	112.016	[M+H]+	authentic standard	UNCLASSIFIED	NA
pme0241	Benzoicacid	Benzoicacidderivatives	Positive	123	76.9	4.48	122.037	[M+H]+	authentic standard	UNCLASSIFIED	NA
pme0243	Glutaricacid	Organicacids	Negative	131	86.9	2.08	132.042	[M-H]-	authentic standard	UNCLASSIFIED	NA
pme0246	L-Cysteine	Aminoacids	Positive	122	80.1	0.83	121.02	[M+H]+	authentic standard	UNCLASSIFIED	NA
pme0247	trans-4-Hydroxy-L-proline	Aminoacidderivatives	Negative	130.1	128	0.8	131.058	[M-H]-	authentic standard	UNCLASSIFIED	NA
pme0249	Azelaicacid	Organicacids	Positive	189.1	97	4.4	188.105	[M+H]+	authentic standard	UNCLASSIFIED	NA
pme0252	N-Acetyl-l-leucine	Aminoacidderivatives	Negative	172.1	130	3.41	173.105	[M-H]-	authentic standard	UNCLASSIFIED	NA
pme0256	Xanthine	Nucleotideanditsderivates	Negative	151	108	1.17	152.033	[M-H]-	authentic standard	UNCLASSIFIED	NA
pme0257	Uracil	Nucleotideanditsderivates	Negative	111	111	1	112.027	[M-H]-	authentic standard	UNCLASSIFIED	NA
pme0267	2-Methylsuccinicacid	Organicacids	Negative	131	86.9	1.93	132.042	[M-H]-	authentic standard	UNCLASSIFIED	NA
pme0269	Dodecanedioicaicd	Organicacids	Negative	229.2	167.2	6.09	230.152	[M-H]-	authentic standard	UNCLASSIFIED	NA
pme0274	6-Aminocaproicacid	Organicacids	Positive	132.1	76.9	1	131.095	[M+H]+	authentic standard	UNCLASSIFIED	NA
pme0275	4-Oxopentanoate	Organicacids	Negative	115	97.9	1.86	116.047	[M-H]-	authentic standard	UNCLASSIFIED	NA
pme0279	2,6-Diaminooimelicacid	Aminoacidderivatives	Negative	189.1	128.1	0.75	190.095	[M-H]-	authentic standard	UNCLASSIFIED	NA
pme0281	Terephthalicacid	Organicacids	Negative	165	121.1	2.87	166.027	[M-H]-	authentic standard	UNCLASSIFIED	NA
pme0282	Phthalicacid	Organicacids	Negative	165	76.9	2.86	166.027	[M-H]-	authentic standard	UNCLASSIFIED	NA
pme0291	Dl-2-Aminooctanoicacid	Organicacids	Positive	160.1	114.1	3.04	159.126	[M+H]+	authentic standard	UNCLASSIFIED	NA
pme0309	Methylgallate	Benzoicacidderivatives	Negative	183	124.1	2.99	184.037	[M-H]-	authentic standard	UNCLASSIFIED	NA
pme0321	Kaempferol7-O-rhamnoside	Flavonol	Negative	431.1	285.1	4.72	432.106	[M-H]-	authentic standard	UNCLASSIFIED	NA
pme0324	Chrysin	Flavone	Positive	255.1	69.7	6.73	254.058	[M+H]+	authentic standard	UNCLASSIFIED	NA
pme0363	Chrysoeriol	Flavone	Negative	299.1	284	5.68	300.063	[M-H]-	authentic standard	UNCLASSIFIED	NA
pme0390	4-Methylumbelliferone	Hydroxycinnamoylderivatives	Negative	175	175	4.46	176.047	[M-H]-	authentic standard	UNCLASSIFIED	NA
pme0395	2-Methoxybenzoicacid	Hydroxycinnamoylderivatives	Positive	153	135.1	4.2	152.047	[M+H]+	authentic standard	UNCLASSIFIED	NA
pme0418	3-(4-Hydroxyphenyl)propionicacid	Hydroxycinnamoylderivatives	Negative	165.1	92.9	3.83	166.063	[M-H]-	authentic standard	UNCLASSIFIED	NA
pme0424	trans-cinnamaldehyde	Hydroxycinnamoylderivatives	Positive	133.1	115	5.83	132.058	[M+H]+	authentic standard	UNCLASSIFIED	NA
pme0463	L-Theanine	Aminoacids	Positive	175	158.1	1.12	174.1	[M+H]+	authentic standard	UNCLASSIFIED	NA
pme0490	Nicotinicacid	Nicotinicacidderivatives	Positive	124	78	1.14	123	[M+H]+	authentic standard	UNCLASSIFIED	NA
pme0513	Xylitol	Alcoholsandpolyols	Negative	151	70.8	0.74	152.069	[M-H]-	authentic standard	UNCLASSIFIED	NA
pme0516	Inositol	Others	Negative	179.2	87	0.72	180.063	[M-H]-	authentic standard	UNCLASSIFIED	NA
pme0519	D-(+)-Sucrose	Carbohydrates	Negative	341	58.8	0.78	342.116	[M-H]-	authentic standard	UNCLASSIFIED	NA
pme0534	Gluconicacid	Carbohydrates	Negative	195.2	75.1	0.75	196.058	[M-H]-	authentic standard	UNCLASSIFIED	NA
pme1021	D-(+)-Glucono-1,5-lactone	Carbohydrates	Negative	177.1	70.8	0.74	178.048	[M-H]-	authentic standard	UNCLASSIFIED	NA
pme1070	L-(-)-Tyrosine	Aminoacids	Negative	180.1	163	1.14	181.074	[M-H]-	authentic standard	UNCLASSIFIED	NA
pme1137	6-hydroxynicotinicacid	Vitamins	Positive	140	122	1.48	139.027	[M+H]+	authentic standard	UNCLASSIFIED	NA
pme1178	Guanosine	Nucleotideanditsderivates	Positive	284.1	135.2	1.49	283.092	[M+H]+	authentic standard	UNCLASSIFIED	NA
pme1218	2-Picolinicacid	Organicacids	Positive	124	77.8	1.13	123.032	[M+H]+	authentic standard	UNCLASSIFIED	NA
pme1242	S-(methyl)glutathione	Aminoacidderivatives	Positive	322.4	176.1	1.13	321.1	[M+H]+	authentic standard	UNCLASSIFIED	NA
pme1281	Pyridoxal5'-phosphate	Vitamins	Negative	246	78.9	1.86	247.025	[M-H]-	authentic standard	UNCLASSIFIED	NA
pme1296	Xanthosine	Nucleotideanditsderivates	Positive	285.1	153.1	1.49	284.076	[M+H]+	authentic standard	UNCLASSIFIED	NA
pme1306	Pyridoxine5'-phosphate	Vitamins	Positive	250	134	1.25	249.04	[M+H]+	authentic standard	UNCLASSIFIED	NA
pme1378	1-Methyladenosine	Nucleotideanditsderivates	Positive	282.1	150.1	2.19	281.112	[M+H]+	authentic standard	UNCLASSIFIED	NA
pme1383	Pyridoxine	Vitamins	Positive	170.1	134.1	1.14	169.074	[M+H]+	authentic standard	UNCLASSIFIED	NA
pmb2965	CyanidinO-diacetyl-hexoside-O-glycericacid	Anthocyanins	Negative	619.1	531.3	3.2	620.1	[M-H]-	putatively annotated	UNCLASSIFIED	NA
pme1399	Xanthohumol	Flavanone	Positive	355.2	178.9	8.34	354.147	[M+H]+	authentic standard	UNCLASSIFIED	NA
pme1423	Hydrocinnamicacid	Hydroxycinnamoylderivatives	Positive	151.1	105	5.31	150.068	[M+H]+	authentic standard	UNCLASSIFIED	NA
pme1439	p-Coumaricacid	Hydroxycinnamoylderivatives	Positive	165	147.1	3.78	164.047	[M+H]+	authentic standard	UNCLASSIFIED	NA
pme1488	Epigallatecatechingallate(EGCG)	Catechinderivatives	Positive	459	139.1	3.27	458.085	[M+H]+	authentic standard	UNCLASSIFIED	NA
pme1496	Formononetin(4'-O-methyldaidzein)	Isoflavone	Negative	267.1	252.1	6.27	268.074	[M-H]-	authentic standard	UNCLASSIFIED	NA
pme1502	Kumatakenin	Flavonol	Positive	315.1	300	7.12	314.079	[M+H]+	authentic standard	UNCLASSIFIED	NA
pme1518	Nobiletin	Flavone	Positive	403.1	373.1	6.94	402.132	[M+H]+	authentic standard	UNCLASSIFIED	NA
pme1550	Tangeretin	Flavone	Positive	373.1	373.1	7.41	372.121	[M+H]+	authentic standard	UNCLASSIFIED	NA
pme1564	Epicatechingallate(ECG)	Catechinderivatives	Positive	443	139.1	3.83	442.3	[M+H]+	authentic standard	UNCLASSIFIED	NA
pme1580	Eriodictyol	Flavanone	Negative	287.1	135.1	4.98	288.063	[M-H]-	authentic standard	UNCLASSIFIED	NA
pme1598	Hesperetin5-O-glucoside	Flavanone	Negative	463.1	301.1	3.81	464.132	[M-H]-	authentic standard	UNCLASSIFIED	NA
pme1599	7-O-Methyleriodictyol	Flavanone	Negative	301.1	135.1	6.07	302.079	[M-H]-	authentic standard	UNCLASSIFIED	NA
pme1662	sakuranetin	Flavone	Positive	287.1	287.1	6.85	286.084	[M+H]+	authentic standard	UNCLASSIFIED	NA
pme1683	D-Pantothenicdcid	Organicacids	Positive	477.2	258.1	2.09	476.168	[M+H]+	authentic standard	UNCLASSIFIED	NA
pme1692	Inosine5'-monophosphate	Nucleotideanditsderivates	Negative	347	78.8	1.14	348.047	[M-H]-	authentic standard	UNCLASSIFIED	NA
pme1709	NicotinicAcidMethylEster(MethylNicotinate)	Vitamins	Positive	138.1	78	3.62	137.048	[M+H]+	authentic standard	UNCLASSIFIED	NA
pme1730	D-Erythronolactone	Organicacids	Negative	117	99.8	0.75	118.027	[M-H]-	authentic standard	UNCLASSIFIED	NA
pme1738	3-Carbamyl-1-methylpyridinium(1-Methylnicotinamide)	Pyridinederivatives	Positive	138.1	95	0.81	137.071	[M+H]+	authentic standard	UNCLASSIFIED	NA
pme1820	p–Hydroxyphenylaceticacid	Organicacids	Negative	151	107.1	3.22	152.047	[M-H]-	authentic standard	UNCLASSIFIED	NA
pme1828	Betaine	Alkaloids	Positive	118.1	118.1	0.77	117.079	[M+H]+	authentic standard	UNCLASSIFIED	NA
pme1832	Succinicacid	Organicacids	Positive	119	91	1.34	118.027	[M+H]+	authentic standard	UNCLASSIFIED	NA
pme1841	1,5-Diaminopentane	Phenolamides	Positive	103	86.1	0.62	102.116	[M+H]+	authentic standard	UNCLASSIFIED	NA
pme1852	Creatine	Organicacids	Positive	132.1	90	0.81	131.07	[M+H]+	authentic standard	UNCLASSIFIED	NA
pme1980	Subericacid	Organicacids	Positive	175.1	83.1	3.8	174.089	[M+H]+	authentic standard	UNCLASSIFIED	NA
pme1988	L-Alanine	Aminoacids	Positive	90	71.8	0.79	89.048	[M+H]+	authentic standard	UNCLASSIFIED	NA
pme2019	DL-Arabinose	Carbohydrates	Negative	149	58.9	0.75	150.053	[M-H]-	authentic standard	UNCLASSIFIED	NA
pme2046	3-N-Methyl-L-histidine	Aminoacidderivatives	Positive	170	96	0.67	169.181	[M+H]+	authentic standard	UNCLASSIFIED	NA
pme2108	L-Carnitine	Others	Positive	163	103	0.68	162.113	[M+H]+	authentic standard	UNCLASSIFIED	NA
pme2165	Oroticacid	Vitamins	Negative	155	111	1.08	156.017	[M-H]-	authentic standard	UNCLASSIFIED	NA
pme2246	Ellagicacid	Others	Negative	301	58.8	3.76	302.006	[M-H]-	authentic standard	UNCLASSIFIED	NA
pme2253	L-Gulonic-γ-lactone	Carbohydrates	Negative	177.1	74.8	0.79	178.048	[M-H]-	authentic standard	UNCLASSIFIED	NA
pme2256	D-Arabitol	Alcoholsandpolyols	Negative	151.1	70.8	0.73	152.069	[M-H]-	authentic standard	UNCLASSIFIED	NA
pme2266	Biotin	Vitamins	Positive	245.1	227.1	3.31	244.088	[M+H]+	authentic standard	UNCLASSIFIED	NA
pme2292	Putrescine	Phenolamides	Positive	89	71.9	0.63	88.1	[M+H]+	authentic standard	UNCLASSIFIED	NA
pme2367	Quinone	Others	Positive	109	80.9	3.28	108.021	[M+H]+	authentic standard	UNCLASSIFIED	NA
pme2380	A-Ketoglutaricacid	Organicacids	Negative	145	80.8	1.13	146.022	[M-H]-	authentic standard	UNCLASSIFIED	NA
pme2430	N-Acetyl-L-tyrosine	Aminoacidderivatives	Positive	224.1	136.1	2.49	223.085	[M+H]+	authentic standard	UNCLASSIFIED	NA
pme2457	Luteolin7-O-glucoside(Cynaroside)	Flavone	Negative	447.3	285.1	3.82	448.101	[M-H]-	authentic standard	UNCLASSIFIED	NA
pme2563	γ-Glu-Cys	Aminoacidderivatives	Negative	249.3	128	1.13	250.062	[M-H]-	authentic standard	UNCLASSIFIED	NA
pme2566	(5-L-Glutamyl)-L-aminoacid	Aminoacidderivatives	Negative	217	88	1.14	218.09	[M-H]-	authentic standard	UNCLASSIFIED	NA
pme2575	L-Carnosine	Aminoacidderivatives	Negative	225.2	154.1	0.68	226.107	[M-H]-	authentic standard	UNCLASSIFIED	NA
pme2589	Oxoadipicacid	Organicacids	Negative	159.1	58.8	1.15	160.037	[M-H]-	authentic standard	UNCLASSIFIED	NA
pme2602	O-Phospho-L-serine	Aminoacidderivatives	Negative	184.1	78.8	1.25	185.009	[M-H]-	authentic standard	UNCLASSIFIED	NA
pme2607	5-Hydroxyindole-3-aceticacid	Indolederivatives	Positive	192.1	114.9	2.84	191.058	[M+H]+	authentic standard	UNCLASSIFIED	NA
pme2634	Dl-Norvaline	Aminoacids	Positive	118	88	0.83	117.079	[M+H]+	authentic standard	UNCLASSIFIED	NA
pme2636	Enterodiol	Alcoholsandpolyols	Negative	301.2	253.2	4.6	302.152	[M-H]-	authentic standard	UNCLASSIFIED	NA
pme2651	NADP	Others	Negative	742.1	620.2	1.13	743.075	[M-H]-	authentic standard	UNCLASSIFIED	NA
pme2661	VitaminD3	Vitamins	Negative	383	281.1	5.61	384.339	[M-H]-	authentic standard	UNCLASSIFIED	NA
pme2723	Indole-3-carboxaldehyde	Indolederivatives	Positive	146.1	118.1	4.45	145.053	[M+H]+	authentic standard	UNCLASSIFIED	NA
pme2735	S-(5'-Adenosyl)-L-methionine	Aminoacidderivatives	Positive	399.2	250.1	0.75	398.137	[M+H]+	authentic standard	UNCLASSIFIED	NA
pme2755	N-Acetyl-D-glucosamine	Carbohydrates	Positive	222	138.1	0.62	221.09	[M+H]+	authentic standard	UNCLASSIFIED	NA
pme2761	4-Hydroxy-2-oxoglutaricacid	Organicacids	Negative	161	160.9	1.15	162.016	[M-H]-	authentic standard	UNCLASSIFIED	NA
pme2801	7-Methylxanthine	Nucleotideanditsderivates	Positive	167	124.1	1.83	166.049	[M+H]+	authentic standard	UNCLASSIFIED	NA
pme2819	All-trans-13,14-dihydroretinol	Vitamins	Positive	287.2	173.2	11.1	286.23	[M+H]+	authentic standard	UNCLASSIFIED	NA
pme2828	4-Nitrophenol	Others	Positive	140	98.9	0.61	139.027	[M+H]+	authentic standard	UNCLASSIFIED	NA
pme2879	5-Hydroxymethyluracil	Nucleotideanditsderivates	Negative	141	123	1.05	142.038	[M-H]-	authentic standard	UNCLASSIFIED	NA
pme2884	Guanidinoethylsulfonate	Organicacids	Negative	166	124.1	0.83	167.037	[M-H]-	authentic standard	UNCLASSIFIED	NA
pme2890	L-Homocystine	Aminoacids	Positive	269	134	0.83	268.055	[M+H]+	authentic standard	UNCLASSIFIED	NA
pme2898	Dihydromyricetin	Flavonol	Positive	321.1	153.1	3.47	320.053	[M+H]+	authentic standard	UNCLASSIFIED	NA
pme2931	2-(-)-Carvone	Others	Positive	151.1	109	7.01	150.105	[M+H]+	authentic standard	UNCLASSIFIED	NA
pme2979	Pinocembrin(Dihydrochrysin)	Flavanone	Negative	255.1	151.1	6.94	256.074	[M-H]-	authentic standard	UNCLASSIFIED	NA
pme2988	3,4-Dihydrocoumarin	Coumarins	Positive	149.2	107	5.59	148.052	[M+H]+	authentic standard	UNCLASSIFIED	NA
pme3011	γ-aminobutyricacid	Organicacids	Positive	104.1	87	0.75	103.063	[M+H]+	authentic standard	UNCLASSIFIED	NA
pme3017	2-Aminoisobutyricacid	Aminoacidderivatives	Positive	104	85.9	0.74	103.063	[M+H]+	authentic standard	UNCLASSIFIED	NA
pme3033	N,N-Dimethylglycine	Aminoacidderivatives	Positive	104	58	0.75	103.063	[M+H]+	authentic standard	UNCLASSIFIED	NA
pme3034	ethylmalonate	Organicacids	Negative	131	86.9	1.78	132.042	[M-H]-	authentic standard	UNCLASSIFIED	NA
pme3081	4-(Aminomethyl)-5-(hydroxymethyl)-2-methylpyridin-3-ol	Others	Positive	169.1	134.1	0.74	168.09	[M+H]+	authentic standard	UNCLASSIFIED	NA
pme3083	2-(Formylamino)benzoicacid	Organicacids	Negative	164	92	3.8	165.043	[M-H]-	authentic standard	UNCLASSIFIED	NA
pme3104	1-Methyladenine	Nucleotideanditsderivates	Positive	150	133.1	1.03	149.07	[M+H]+	authentic standard	UNCLASSIFIED	NA
pme3143	6-Hydroxy-4-methylcoumarin	Coumarins	Positive	177	121	4.31	176.047	[M+H]+	authentic standard	UNCLASSIFIED	NA
pme3148	L-Palmitoylcarnitine	Others	Positive	400.3	341.4	8.17	399.335	[M+H]+	authentic standard	UNCLASSIFIED	NA
pme3151	Deoxyribose5-phosphate	Nucleotideanditsderivates	Negative	213	78.9	1.23	214.016	[M-H]-	authentic standard	UNCLASSIFIED	NA
pme3154	(Rs)-Mevalonicacid	Organicacids	Negative	147.1	58.8	1.31	148.074	[M-H]-	authentic standard	UNCLASSIFIED	NA
pme3163	D-Sedoheptuiose7-phosphate	Carbohydrates	Negative	289	78.9	1.1	290.04	[M-H]-	authentic standard	UNCLASSIFIED	NA
pme3184	2'-Deoxyadenosine-5'-monophosphate	Nucleotideanditsderivates	Positive	332	136.1	1.14	331.068	[M+H]+	authentic standard	UNCLASSIFIED	NA
pme3186	Dl-Glyceraldehyde3-phosphate	Others	Negative	169	122.8	1.1	169.998	[M-H]-	authentic standard	UNCLASSIFIED	NA
pme3193	N-acetylglycine	Aminoacidderivatives	Negative	116	73.9	1.12	117.043	[M-H]-	authentic standard	UNCLASSIFIED	NA
pme3200	1-methylguanidine	Nucleotideanditsderivates	Positive	74	56.9	0.78	73.0971	[M+H]+	authentic standard	UNCLASSIFIED	NA
pme3207	trans,trans-Muconicacid	Organicacids	Negative	141	58.7	0.69	142.027	[M-H]-	authentic standard	UNCLASSIFIED	NA
pme3208	Glycitin	Isoflavone	Negative	445	282.1	3.59	446.121	[M-H]-	authentic standard	UNCLASSIFIED	NA
pme3237	Liquiritigenin	Flavanone	Positive	257	137.1	4.85	256.074	[M+H]+	authentic standard	UNCLASSIFIED	NA
pme3250	BiochaninA	Isoflavone	Positive	285	270.2	7.09	284.069	[M+H]+	authentic standard	UNCLASSIFIED	NA
pme3290	3,7-Di-O-methylquercetin	Flavonol	Positive	331	316	6.47	330.074	[M+H]+	authentic standard	UNCLASSIFIED	NA
pme3305	p-Coumarylalcohol	Hydroxycinnamoylderivatives	Negative	149	130.1	3.6	150.068	[M-H]-	authentic standard	UNCLASSIFIED	NA
pme3333	1,4-dihydro-1-Methyl-4-oxo-3-pyridinecarboxamide	Pyridinederivatives	Positive	153.1	136.1	1.49	152.059	[M+H]+	authentic standard	UNCLASSIFIED	NA
pme3350	8-Hydroxy-2-deoxyguanosine	Nucleotideanditsderivates	Positive	284	168.1	1.8	283.092	[M+H]+	authentic standard	UNCLASSIFIED	NA
pme3351	Allysine(6-OxoDL-Norleucine)	Aminoacidderivatives	Negative	144.1	126.1	0.82	145.074	[M-H]-	authentic standard	UNCLASSIFIED	NA
pme3367	6-MethylCoumarin	Coumarins	Positive	161	105.1	6.02	160.052	[M+H]+	authentic standard	UNCLASSIFIED	NA
pme3369	Rhamnetin(7-O-methxylquercetin)	Flavonol	Negative	315	165.1	6.28	316.058	[M-H]-	authentic standard	UNCLASSIFIED	NA
pme3382	N-Acetylthreonine	Aminoacidderivatives	Negative	160	73.9	1.14	161.069	[M-H]-	authentic standard	UNCLASSIFIED	NA
pme3399	Sissotrin	Isoflavone	Negative	445.1	283.1	5.02	446.121	[M-H]-	authentic standard	UNCLASSIFIED	NA
pme3401	Syringetin	Flavonol	Negative	345	330.2	5.59	346.069	[M-H]-	authentic standard	UNCLASSIFIED	NA
pme3410	Laricitrin	Flavonol	Positive	333	305.2	4.89	332.053	[M+H]+	authentic standard	UNCLASSIFIED	NA
pme3431	Esculin(6,7-Dihydroxycoumarin-6-glucoside)	Coumarins	Positive	341	179.1	2.46	340.079	[M+H]+	authentic standard	UNCLASSIFIED	NA
pme3442	Quercetin7-O-β-D-Glucuronide	Flavonol	Negative	477.1	301.1	3.67	478.36	[M-H]-	authentic standard	UNCLASSIFIED	NA
pme3461	Homoeriodictyol	Flavanone	Negative	301.1	151	5.66	302.279	[M-H]-	authentic standard	UNCLASSIFIED	NA
pme3464	Isosakuranetin(4'-Methylnaringenin)	Flavanone	Negative	285.1	164	6.88	286.084	[M-H]-	authentic standard	UNCLASSIFIED	NA
pme3507	7,4'-Dihydroxyflavone	Flavone	Negative	253.1	253.1	4.57	254.058	[M-H]-	authentic standard	UNCLASSIFIED	NA
pme3840	Pantothenol	Alcoholsandpolyols	Negative	204.1	71.7	0.8	205.131	[M-H]-	authentic standard	UNCLASSIFIED	NA

## Sheet: Catechins
Table S2. WGCNA results of metabolomic dataset and analysis the levels of catechin, anthocyanins, and procyanidins.
Compounds	GA1	GA2	GA3	GB1	GB2	GB3	GC1	GC2	GC3	YA1	YA2	YA3	YB1	YB2	YB3	YC1	YC2	YC3	WA1	WA2	WA3	WB1	WB2	WB3	PA1	PA2	PA3	PB1	PB2	PB3	PC1	PC2	PC3
Catechin gallate (CG)	10900000	10300000	12700000	11000000	10700000	11900000	14600000	14500000	13800000	11800000	11800000	11600000	11200000	11200000	11100000	10700000	10200000	10600000	7380000	7690000	7980000	7390000	7360000	7590000	10300000	10300000	9660000	8010000	7640000	6740000	9960000	9160000	9390000
Gallocatechin gallate (GCG)	11000000	11200000	11900000	12300000	11400000	12100000	11000000	11900000	10200000	13600000	13100000	12700000	8800000	9070000	8320000	11700000	10400000	10400000	9380000	8270000	9060000	11800000	11100000	10300000	11000000	11800000	11400000	12900000	13300000	11900000	7600000	7880000	8360000
Epicatechingallate (ECG)	98700000	102000000	115000000	104000000	93900000	105000000	119000000	124000000	120000000	104000000	111000000	105000000	106000000	98300000	93900000	98800000	93300000	95700000	72600000	79000000	77400000	76900000	73100000	73600000	90000000	87000000	84800000	72400000	70700000	63900000	88700000	85900000	82400000
Epigallatecatechingallate (EGCG)	181000000	186000000	194000000	202000000	188000000	197000000	193000000	192000000	193000000	219000000	211000000	208000000	143000000	143000000	136000000	173000000	162000000	167000000	150000000	149000000	152000000	175000000	172000000	175000000	187000000	186000000	182000000	216000000	211000000	205000000	136000000	132000000	132000000
Catechin	1540000	1890000	1910000	2470000	2020000	2690000	3050000	2950000	2610000	1600000	1740000	1700000	3890000	3470000	2920000	2170000	1850000	1960000	2200000	2190000	2670000	1810000	1840000	1630000	3350000	3680000	3720000	2930000	2800000	2900000	2330000	2840000	2250000
Epicatechin (EC)	6310000	7110000	6810000	5960000	5280000	6210000	8470000	8450000	7700000	5080000	5250000	5210000	12000000	11700000	10400000	7690000	7120000	7360000	7030000	7090000	7920000	6770000	6410000	6460000	7950000	7860000	8220000	7180000	7110000	7240000	10800000	11900000	10900000
Gallocatechin (GC)	1360000	1520000	1330000	2220000	1670000	2190000	2830000	2790000	2940000	1210000	1230000	1140000	2530000	2190000	1800000	1740000	1390000	1360000	1400000	1420000	1680000	2400000	2150000	1780000	2490000	2340000	2500000	4420000	3850000	4360000	657000	854000	694000
Epigallocatechin(EGC)	11900000	12700000	12300000	11600000	9080000	11300000	16500000	16400000	16800000	7630000	7220000	7560000	18600000	18100000	14700000	15800000	13700000	13600000	11200000	12200000	12900000	18300000	16700000	15900000	12500000	12700000	14000000	14500000	15800000	15100000	12700000	14200000	13100000
(ECG+EGCG)/Total	0.866722	0.865593	0.868099	0.870431	0.87533	0.866845	0.846791	0.847208	0.852745	0.887558	0.888668	0.886912	0.813672	0.812376	0.823601	0.845149	0.851113	0.852977	0.852253	0.854381	0.844593	0.838632	0.843253	0.850612	0.853384	0.848669	0.843503	0.852397	0.847983	0.847891	0.836102	0.82309	0.827499

## Sheet: Anthocyanins
Table S2. WGCNA results of metabolomic dataset and analysis the levels of catechin, anthocyanins, and procyanidins.
Index	Ion mode	Q1 (Da)	Q3 (Da) MS only	Rt (min)	Molecular Weight (Da)	Ionization model	Compounds	GA1	GA2	GA3	GB1	GB2	GB3	GC1	GC2	GC3	YA1	YA2	YA3	YB1	YB2	YB3	YC1	YC2	YC3	WA1	WA2	WA3	WB1	WB2	WB3	PA1	PA2	PA3	PB1	PB2	PB3	PC1	PC2	PC3
pmb0541	Positive	697.1	696.9	2.17	697.1	Protonated	Cyanidin3-O-glucosyl-malonylglucoside	189000	255000	193000	124000	162000	158000	83200	28300	58000	196000	217000	174000	83500	55400	59600	135000	190000	144000	86600	95500	71900	189000	191000	280000	99700	97600	61100	9	9	9	9	9	9
pmb0545	Positive	477.1	315.6	3.36	477.1	Protonated	RosinidinO-hexoside	9	93700	9	433000	409000	336000	341000	361000	362000	221000	184000	9	339000	371000	218000	318000	293000	473000	9	9	9	544000	601000	819000	9	9	379000	9	9	9	235000	262000	278000
pmb0550	Positive	449.1	287.3	2.35	449.1	Protonated	Cyanidin3-O-glucoside(Kuromanin)	9	9	184000	2530000	1380000	2510000	891000	885000	534000	3810000	3340000	3060000	438000	262000	259000	861000	318000	432000	9	9	9	348000	256000	277000	15200000	18400000	17500000	19800000	16300000	19300000	40100000	61300000	55600000
pmb0563	Positive	301.1	273.6	3.98	301.1	Protonated	Peonidin	182000	88300	142000	155000	63800	121000	74500	69900	117000	81500	130000	116000	103000	142000	141000	181000	81200	93500	76400	87000	83200	165000	103000	93700	62500	78400	67500	161000	138000	229000	667000	741000	739000
pmb2957	Negative	465.1	285.3	2.42	466.1	[M-H]-	CyanidinO-syringicacid	280000	283000	259000	3320000	2490000	2620000	913000	775000	860000	1100000	1350000	1180000	643000	590000	758000	1990000	1260000	1290000	292000	393000	399000	1020000	1080000	985000	3720000	4460000	4650000	4620000	4400000	5030000	2640000	3420000	3350000
pmb2959	Negative	489.1	285.3	2.91	490.1	[M-H]-	CyanidinO-acetylhexoside	49400	37500	101000	13300	13700	22600	9	9	9	59100	51900	48700	9	9	4670	20000	19100	17500	19800	10400	16000	5870	8560	12600	17200	13800	14400	373000	482000	392000	9	9	9
pmb2965	Negative	619.1	531.3	3.2	620.1	[M-H]-	CyanidinO-diacetyl-hexoside-O-glycericacid	24300	24900	26000	24800	27800	28800	42500	37600	32800	27100	31200	28500	18400	22700	24500	39400	28200	35600	28300	28000	27100	31400	32100	39900	36300	34000	24800	23200	19300	23800	30700	24800	25800
pme0442	Positive	303	149.3	2.67	303.24	Protonated	Delphinidin	2410000	2270000	2240000	1100000	1180000	1260000	261000	370000	335000	1300000	1250000	1230000	986000	1020000	988000	1500000	1480000	1230000	1250000	1140000	1170000	1610000	1550000	2150000	825000	955000	942000	9	9	9	603000	432000	450000
pme1397	Positive	271	215.1	3.75	271.24	Protonated	Pelargonidin	274000	262000	529000	360000	330000	399000	420000	497000	338000	897000	925000	852000	511000	540000	496000	615000	481000	576000	465000	442000	586000	231000	215000	241000	702000	681000	671000	206000	205000	126000	463000	439000	256000
pme1398	Positive	465.1	303.1	2.14	465.1	Protonated	Delphinidin3-O-glucoside(Mirtillin)	9	158000	9	2100000	1270000	1500000	967000	1140000	660000	2670000	2200000	2190000	9	9	9	835000	431000	460000	9	9	9	368000	351000	314000	16800000	22100000	18200000	33700000	34200000	35200000	23800000	38100000	19000000
pme1773	Positive	595	287.9	2.47	595	Protonated	Cyanidin3-O-rutinoside(Keracyanin)	83100	91300	107000	53900	30300	56900	119000	133000	96600	34900	61100	52600	211000	198000	141000	161000	126000	114000	96000	96100	138000	173000	155000	124000	176000	221000	228000	324000	304000	324000	779000	965000	920000
pme1777	Positive	611	287.7	1.93	611	Protonated	Cyanidin3,5-O-diglucoside(Cyanin)	57200	78000	91200	60900	41800	75000	221000	255000	188000	58100	83800	68100	209000	168000	125000	225000	130000	135000	104000	92900	137000	237000	222000	182000	358000	373000	394000	641000	535000	633000	643000	969000	775000
pme1793	Positive	595	271.8	2.27	595	Protonated	Pelargonin	1150000	1360000	1650000	2350000	1520000	2110000	2530000	2870000	2500000	2050000	3060000	2250000	3090000	2810000	2070000	2990000	2020000	1760000	1570000	1790000	2290000	2340000	2740000	1910000	9510000	8960000	9180000	6970000	7000000	6810000	6330000	7730000	6080000
pme3256	Positive	611	303	2.51	611	Protonated	Delphinidin3-O-rutinoside(Tulipanin)	6660000	5730000	6140000	2470000	2350000	2720000	292000	377000	366000	4060000	3530000	3640000	1720000	2130000	2260000	2800000	3830000	2840000	2800000	2130000	2570000	5180000	4760000	6980000	2100000	1540000	2230000	9	9	9	9	9	9
pme3392	Positive	433.1	271	2.64	433.1	Protonated	Pelargonidin3-O-beta-D-glucoside（Callistephinchloride)	9	9	9	1720000	773000	1720000	353000	554000	9	2220000	2300000	2050000	9	9	9	9	9	9	9	9	9	9	9	9	12300000	16200000	17800000	4680000	3830000	4320000	6850000	10500000	8420000
pme3609	Positive	287	231.6	3.52	287.24	Protonated	Cyanidin	39900	40600	44800	124000	147000	95900	196000	215000	149000	33300	37000	37200	28400	15700	11500	184000	189000	215000	79300	65300	105000	81600	73600	79700	171000	135000	178000	7340	4430	9920	32800	55900	72500
							Compounds	GA_average			GB_average			GC_average			YA_average			YB_average			YC_average			WA_average			WB_average			PA_average			PB_average			PC_average
							Cyanidin3-O-glucosyl-malonylglucoside	212333		Cyanidin3-O-glucosyl-malonylglucoside	148000		Cyanidin3-O-glucosyl-malonylglucoside	56500		Cyanidin3-O-glucosyl-malonylglucoside	195667		Cyanidin3-O-glucosyl-malonylglucoside	66166.7		Cyanidin3-O-glucosyl-malonylglucoside	156333		Cyanidin3-O-glucosyl-malonylglucoside	84666.7		Cyanidin3-O-glucosyl-malonylglucoside	220000		Cyanidin3-O-glucosyl-malonylglucoside	86133.3		Cyanidin3-O-glucosyl-malonylglucoside	9		Cyanidin3-O-glucosyl-malonylglucoside	9
							RosinidinO-hexoside	31239.3		RosinidinO-hexoside	392667		RosinidinO-hexoside	354667		RosinidinO-hexoside	135003		RosinidinO-hexoside	309333		RosinidinO-hexoside	361333		RosinidinO-hexoside	9		RosinidinO-hexoside	654667		RosinidinO-hexoside	126339		RosinidinO-hexoside	9		RosinidinO-hexoside	258333
							Cyanidin3-O-glucoside(Kuromanin)	61339.3		Cyanidin3-O-glucoside(Kuromanin)	2140000		Cyanidin3-O-glucoside(Kuromanin)	770000		Cyanidin3-O-glucoside(Kuromanin)	3.40333e+06		Cyanidin3-O-glucoside(Kuromanin)	319667		Cyanidin3-O-glucoside(Kuromanin)	537000		Cyanidin3-O-glucoside(Kuromanin)	9		Cyanidin3-O-glucoside(Kuromanin)	293667		Cyanidin3-O-glucoside(Kuromanin)	1.70333e+07		Cyanidin3-O-glucoside(Kuromanin)	1.84667e+07		Cyanidin3-O-glucoside(Kuromanin)	5.23333e+07
							Peonidin	137433		Peonidin	113267		Peonidin	87133.3		Peonidin	109167		Peonidin	128667		Peonidin	118567		Peonidin	82200		Peonidin	120567		Peonidin	69466.7		Peonidin	176000		Peonidin	715667
							CyanidinO-syringicacid	274000		CyanidinO-syringicacid	2810000		CyanidinO-syringicacid	849333		CyanidinO-syringicacid	1210000		CyanidinO-syringicacid	663667		CyanidinO-syringicacid	1.51333e+06		CyanidinO-syringicacid	361333		CyanidinO-syringicacid	1.02833e+06		CyanidinO-syringicacid	4.27667e+06		CyanidinO-syringicacid	4.68333e+06		CyanidinO-syringicacid	3.13667e+06
							CyanidinO-acetylhexoside	62633.3		CyanidinO-acetylhexoside	16533.3		CyanidinO-acetylhexoside	9		CyanidinO-acetylhexoside	53233.3		CyanidinO-acetylhexoside	1562.67		CyanidinO-acetylhexoside	18866.7		CyanidinO-acetylhexoside	15400		CyanidinO-acetylhexoside	9010		CyanidinO-acetylhexoside	15133.3		CyanidinO-acetylhexoside	415667		CyanidinO-acetylhexoside	9
							CyanidinO-diacetyl-hexoside-O-glycericacid	25066.7		CyanidinO-diacetyl-hexoside-O-glycericacid	27133.3		CyanidinO-diacetyl-hexoside-O-glycericacid	37633.3		CyanidinO-diacetyl-hexoside-O-glycericacid	28933.3		CyanidinO-diacetyl-hexoside-O-glycericacid	21866.7		CyanidinO-diacetyl-hexoside-O-glycericacid	34400		CyanidinO-diacetyl-hexoside-O-glycericacid	27800		CyanidinO-diacetyl-hexoside-O-glycericacid	34466.7		CyanidinO-diacetyl-hexoside-O-glycericacid	31700		CyanidinO-diacetyl-hexoside-O-glycericacid	22100		CyanidinO-diacetyl-hexoside-O-glycericacid	27100
							Delphinidin	2.30667e+06		Delphinidin	1180000		Delphinidin	322000		Delphinidin	1260000		Delphinidin	998000		Delphinidin	1.40333e+06		Delphinidin	1.18667e+06		Delphinidin	1770000		Delphinidin	907333		Delphinidin	9		Delphinidin	495000
							Pelargonidin	355000		Pelargonidin	363000		Pelargonidin	418333		Pelargonidin	891333		Pelargonidin	515667		Pelargonidin	557333		Pelargonidin	497667		Pelargonidin	229000		Pelargonidin	684667		Pelargonidin	179000		Pelargonidin	386000
							Delphinidin3-O-glucoside(Mirtillin)	52672.7		Delphinidin3-O-glucoside(Mirtillin)	1.62333e+06		Delphinidin3-O-glucoside(Mirtillin)	922333		Delphinidin3-O-glucoside(Mirtillin)	2.35333e+06		Delphinidin3-O-glucoside(Mirtillin)	9		Delphinidin3-O-glucoside(Mirtillin)	575333		Delphinidin3-O-glucoside(Mirtillin)	9		Delphinidin3-O-glucoside(Mirtillin)	344333		Delphinidin3-O-glucoside(Mirtillin)	1.90333e+07		Delphinidin3-O-glucoside(Mirtillin)	3.43667e+07		Delphinidin3-O-glucoside(Mirtillin)	2.69667e+07
							Cyanidin3-O-rutinoside(Keracyanin)	93800		Cyanidin3-O-rutinoside(Keracyanin)	47033.3		Cyanidin3-O-rutinoside(Keracyanin)	116200		Cyanidin3-O-rutinoside(Keracyanin)	49533.3		Cyanidin3-O-rutinoside(Keracyanin)	183333		Cyanidin3-O-rutinoside(Keracyanin)	133667		Cyanidin3-O-rutinoside(Keracyanin)	110033		Cyanidin3-O-rutinoside(Keracyanin)	150667		Cyanidin3-O-rutinoside(Keracyanin)	208333		Cyanidin3-O-rutinoside(Keracyanin)	317333		Cyanidin3-O-rutinoside(Keracyanin)	888000
							Cyanidin3,5-O-diglucoside(Cyanin)	75466.7		Cyanidin3,5-O-diglucoside(Cyanin)	59233.3		Cyanidin3,5-O-diglucoside(Cyanin)	221333		Cyanidin3,5-O-diglucoside(Cyanin)	70000		Cyanidin3,5-O-diglucoside(Cyanin)	167333		Cyanidin3,5-O-diglucoside(Cyanin)	163333		Cyanidin3,5-O-diglucoside(Cyanin)	111300		Cyanidin3,5-O-diglucoside(Cyanin)	213667		Cyanidin3,5-O-diglucoside(Cyanin)	375000		Cyanidin3,5-O-diglucoside(Cyanin)	603000		Cyanidin3,5-O-diglucoside(Cyanin)	795667
							Pelargonin	1.38667e+06		Pelargonin	1.99333e+06		Pelargonin	2.63333e+06		Pelargonin	2.45333e+06		Pelargonin	2.65667e+06		Pelargonin	2.25667e+06		Pelargonin	1.88333e+06		Pelargonin	2330000		Pelargonin	9.21667e+06		Pelargonin	6.92667e+06		Pelargonin	6.71333e+06
							Delphinidin3-O-rutinoside(Tulipanin)	6.17667e+06		Delphinidin3-O-rutinoside(Tulipanin)	2.51333e+06		Delphinidin3-O-rutinoside(Tulipanin)	345000		Delphinidin3-O-rutinoside(Tulipanin)	3.74333e+06		Delphinidin3-O-rutinoside(Tulipanin)	2.03667e+06		Delphinidin3-O-rutinoside(Tulipanin)	3.15667e+06		Delphinidin3-O-rutinoside(Tulipanin)	2500000		Delphinidin3-O-rutinoside(Tulipanin)	5640000		Delphinidin3-O-rutinoside(Tulipanin)	1.95667e+06		Delphinidin3-O-rutinoside(Tulipanin)	9		Delphinidin3-O-rutinoside(Tulipanin)	9
							Pelargonidin3-O-beta-D-glucoside（Callistephinchloride)	9		Pelargonidin3-O-beta-D-glucoside（Callistephinchloride)	1.40433e+06		Pelargonidin3-O-beta-D-glucoside（Callistephinchloride)	302336		Pelargonidin3-O-beta-D-glucoside（Callistephinchloride)	2190000		Pelargonidin3-O-beta-D-glucoside（Callistephinchloride)	9		Pelargonidin3-O-beta-D-glucoside（Callistephinchloride)	9		Pelargonidin3-O-beta-D-glucoside（Callistephinchloride)	9		Pelargonidin3-O-beta-D-glucoside（Callistephinchloride)	9		Pelargonidin3-O-beta-D-glucoside（Callistephinchloride)	1.54333e+07		Pelargonidin3-O-beta-D-glucoside（Callistephinchloride)	4.27667e+06		Pelargonidin3-O-beta-D-glucoside（Callistephinchloride)	8590000
							Cyanidin	41766.7		Cyanidin	122300		Cyanidin	186667		Cyanidin	35833.3		Cyanidin	18533.3		Cyanidin	196000		Cyanidin	83200		Cyanidin	78300		Cyanidin	161333		Cyanidin	7230		Cyanidin	53733.3
							Total	1.12928e+07			1.49535e+07			7.62281e+06			1.8182e+07			8.08715e+06			1.11822e+07			6943636			1.31167e+07			6.96154e+07			70440366			101359527

## Sheet: Procyanidins
Table S2. WGCNA results of metabolomic dataset and analysis the levels of catechin, anthocyanins, and procyanidins.
Index	Ion mode	Q1 (Da)	Q3 (Da) MS only	Rt (min)	Molecular Weight (Da)	Ionization model	Compounds	GA1	GA2	GA3	GB1	GB2	GB3	GC1	GC2	GC3	YA1	YA2	YA3	YB1	YB2	YB3	YC1	YC2	YC3	WA1	WA2	WA3	WB1	WB2	WB3	PA1	PA2	PA3	PB1	PB2	PB3	PC1	PC2	PC3
pmb0837	Positive	577.1	425.4	2.61	576.1	[M+H]+	ProcyanidinA3	1070000	1280000	1440000	1460000	954000	909000	1890000	1910000	1910000	1330000	1390000	1100000	2390000	1820000	1240000	1610000	984000	1320000	1390000	1660000	1920000	2100000	1800000	1600000	2670000	3060000	2340000	2960000	2830000	2720000	2820000	4540000	3960000
pme0431	Positive	577	287.9	3.67	576.127	[M+H]+	ProcyanidinA1	6070000	7640000	9050000	5150000	4510000	4820000	6420000	7420000	3100000	6070000	5980000	6110000	7140000	7300000	6350000	5870000	5960000	6050000	6360000	6550000	7550000	4530000	4040000	3090000	5460000	5130000	6400000	9	9	9	1100000	3130000	1610000
pme0432	Negative	575	285.3	3.64	576.127	[M-H]-	ProcyanidinA2	205000	194000	289000	142000	198000	218000	352000	359000	300000	148000	193000	147000	259000	256000	203000	321000	245000	272000	234000	251000	283000	255000	242000	202000	332000	314000	353000	9	9	9	359000	306000	340000
pme0435	Positive	579.1	127.3	2.71	578.142	[M+H]+	ProcyanidinB2	1260000	1820000	2390000	4260000	3790000	4370000	4040000	4310000	2990000	2590000	2930000	2780000	4880000	4370000	4110000	2770000	2850000	3240000	3930000	3460000	4340000	2810000	2890000	2250000	5290000	5710000	5350000	2630000	2610000	2150000	3620000	4740000	3900000
pme0436	Negative	577.1	407.3	2.78	578.142	[M-H]-	ProcyanidinB3	154000	188000	231000	323000	296000	343000	345000	340000	347000	173000	190000	167000	606000	536000	506000	311000	331000	397000	384000	424000	502000	262000	233000	197000	381000	381000	404000	177000	178000	179000	320000	323000	292000
